# Supplementary material for: The Isolation and Structure Elucidation of Spirotetronate Lobophorins A, B, and H8 from Streptomyces sp. CB09030 and Their Biosynthetic Gene Cluster
Source: MDPI journal article supplement (doi:10.3390/molecules28083597), 2023-04-20
Supplement: s1 [file s1]

## **Supplementary material**

## Table of Contents

|                                                                                                                                                                        |    |
|------------------------------------------------------------------------------------------------------------------------------------------------------------------------|----|
| Table S1 The comparison of NMR data of compound <b>1</b> .....                                                                                                         | 4  |
| Table S2 The comparison of NMR data of compound <b>2</b> .....                                                                                                         | 6  |
| Table S3 The comparison of NMR data of compound <b>3</b> .....                                                                                                         | 8  |
| Table S4 The comparison of NMR data of compound <b>4</b> .....                                                                                                         | 9  |
| Table S5 AntiSMASH-predicted BGCs for <i>S. sp.</i> CB09030. ....                                                                                                      | 11 |
| Table S6 Deduced function of open reading frames (ORFs) in the <i>lob</i> BGC.....                                                                                     | 12 |
| Table S7 The antibacterial activities of LOBs.....                                                                                                                     | 14 |
| Figure S1 Anti-mycobacterial bioassay of the individual fermentation products.....                                                                                     | 15 |
| Figure S2 The purified compounds <b>1-4</b> .....                                                                                                                      | 16 |
| Figure S3 AntiSMASH-predicted BGCs of putative natural products encoded in the genome of <i>S. sp.</i> CB09030.....                                                    | 17 |
| Figure S4 Sequence analysis of glycosyltransferases from three <i>Streptomyces</i> spp. ....                                                                           | 18 |
| Figure S5 Antibacterial assays of compounds <b>1 – 4</b> against <i>M. smegmatis</i> MC <sup>2</sup> 155 and <i>B. subtilis</i> 62305 using broth dilution assay. .... | 19 |
| Figure S6 The cytotoxicity of compounds <b>1</b> .....                                                                                                                 | 19 |
| Figure S7 The HMRS and MS/MS of compound <b>1</b> .....                                                                                                                | 20 |
| Figure S8 The MS/MS of compound <b>2</b> .....                                                                                                                         | 21 |
| Figure S9 The HRMS of compound <b>3</b> .....                                                                                                                          | 22 |
| Figure S10 The HRMS of compound <b>4</b> .....                                                                                                                         | 22 |
| Figure S11 <sup>1</sup> H-NMR spectrum of <b>1</b> in CD <sub>3</sub> OD (400 MHz).....                                                                                | 23 |
| Figure S12 <sup>13</sup> C NMR spectrum of <b>1</b> in CD <sub>3</sub> OD (100 MHz) .....                                                                              | 24 |
| Figure S13 <sup>1</sup> H NMR spectrum of <b>2</b> in CD <sub>3</sub> OD (600 MHz). ....                                                                               | 25 |
| Figure S14 <sup>13</sup> C NMR spectrum of <b>2</b> in CD <sub>3</sub> OD (150 MHz).....                                                                               | 26 |
| Figure S15 DEPT 90 spectrum of <b>2</b> in CD <sub>3</sub> OD .....                                                                                                    | 27 |
| Figure S16 DEPT 135 spectrum of <b>2</b> in CD <sub>3</sub> OD .....                                                                                                   | 27 |
| Figure S17 <sup>1</sup> H- <sup>1</sup> H COSY spectrum of <b>2</b> in CD <sub>3</sub> OD .....                                                                        | 28 |
| Figure S18 HSQC spectrum of <b>2</b> in CD <sub>3</sub> OD .....                                                                                                       | 28 |
| Figure S19 HMBC spectrum of <b>2</b> in CD <sub>3</sub> OD.....                                                                                                        | 29 |
| Figure S20 NOESY spectrum of <b>2</b> in CD <sub>3</sub> OD .....                                                                                                      | 29 |

|                                                                                                  |    |
|--------------------------------------------------------------------------------------------------|----|
| Figure S21 $^1\text{H}$ NMR spectrum of <b>3</b> in $\text{CD}_3\text{OD}$ (500 MHz).....        | 30 |
| Figure S22 $^{13}\text{C}$ -NMR spectrum of <b>3</b> in $\text{CD}_3\text{OD}$ (125 MHz).....    | 31 |
| Figure S23 DEPT 90 spectrum of <b>3</b> in $\text{CD}_3\text{OD}$ .....                          | 32 |
| Figure S24 DEPT 135 spectrum of <b>3</b> in $\text{CD}_3\text{OD}$ .....                         | 32 |
| Figure S25 $^1\text{H}$ - $^1\text{H}$ COSY spectrum of <b>3</b> in $\text{CD}_3\text{OD}$ ..... | 33 |
| Figure S26 HSQC spectrum of <b>3</b> in $\text{CD}_3\text{OD}$ .....                             | 33 |
| Figure S27 HMBC spectrum of <b>3</b> in $\text{CD}_3\text{OD}$ .....                             | 34 |
| Figure S28 NOESY spectrum of <b>3</b> in $\text{CD}_3\text{OD}$ .....                            | 34 |
| Figure S29 $^1\text{H}$ NMR spectrum of <b>4</b> in $\text{CD}_3\text{OD}$ (600 MHz).....        | 35 |
| Figure S30 $^{13}\text{C}$ NMR spectrum of <b>4</b> in $\text{CD}_3\text{OD}$ (150 MHz).....     | 36 |
| Figure S31 DEPT 90 spectrum of <b>4</b> in $\text{CD}_3\text{OD}$ .....                          | 37 |
| Figure S32 DEPT 135 spectrum of <b>4</b> in $\text{CD}_3\text{OD}$ .....                         | 37 |
| Figure S33 $^1\text{H}$ - $^1\text{H}$ COSY spectrum of <b>4</b> in $\text{CD}_3\text{OD}$ ..... | 38 |
| Figure S34 HSQC spectrum of <b>4</b> in $\text{CD}_3\text{OD}$ .....                             | 38 |
| Figure S35 HMBC spectrum of <b>4</b> in $\text{CD}_3\text{OD}$ .....                             | 39 |
| Figure S36 NOESY spectrum of <b>4</b> in $\text{CD}_3\text{OD}$ .....                            | 39 |

**Table S1** The comparison of NMR data of compound **1**.

| Position       | 1 <sup>a</sup>        |                           | LOB A <sup>b</sup> [1] |
|----------------|-----------------------|---------------------------|------------------------|
|                | $\delta_{\text{C}}$   | $\delta_{\text{H}}$       | $\delta_{\text{C}}$    |
|                | type                  | (J in Hz)                 |                        |
| 1              | 177.7, C              |                           | 173.5                  |
| 2              | 99.8, C               |                           | 100.0                  |
| 3              | 203.0, C              |                           | 201.3                  |
| 4              | 52.6, C               |                           | 51.7                   |
| 5              | 45.6, CH              | 2.11 (m, o <sup>c</sup> ) | 44.6                   |
| 6              | 36.6, CH              | 1.63 (m, o)               | 31.6                   |
| 7              | 43.3, CH <sub>2</sub> | 1.59, 1.50 (m, o)         | 42.6                   |
| 8              | 36.6, CH              | 2.26 (m, o)               | 35.1                   |
| 9              | 86.6, CH              | 3.43 (m, o)               | 84.6                   |
| 10             | 40.4, CH              | 2.05 (m, o)               | 39.3                   |
| 11             | 126.7, CH             | 5.73 (d, 10.4)            | 126.3                  |
| 12             | 129.3, CH             | 5.38 (m, o)               | 128.3                  |
| 13             | 56.0, CH              | 3.57 (m, o)               | 51.7                   |
| 14             | 137.7, C              |                           | 137.2                  |
| 15             | 122.5, CH             | 5.22 (d, 9.2)             | 123.0                  |
| 16             | 32.6, CH <sub>2</sub> | 2.42, 2.23 (m, o)         | 31.9                   |
| 17             | 80.8, CH              | 4.25, s                   | 79.8                   |
| 18             | 137.6, C              |                           | 136.0                  |
| 19             | 121.5, CH             | 5.12, (d, 10.1)           | 121.6                  |
| 20             | 41.5, CH              | 3.44 (m, o)               | 41.2                   |
| 21             | 124.0, CH             | 5.41, s                   | 123.9                  |
| 22             | 141.7, C              |                           | 142.5                  |
| 23             | 29.3, CH              | 2.50 (m, o)               | 28.3                   |
| 24             | 36.6, CH <sub>2</sub> | 2.31, 1.63 (m, o)         | 36.0                   |
| 25             | 85.1, C               |                           | 83.7                   |
| 26             | 200.3, C              |                           | 200.9                  |
| 27             | 15.7, CH <sub>3</sub> | 1.50, s                   | 15.5                   |
| 28             | 23.2, CH <sub>3</sub> | 0.67 (d, 5.5)             | 22.9                   |
| 29             | 14.9, CH <sub>3</sub> | 1.14 (d, 6.7)             | 14.6                   |
| 30             | 15.5, CH <sub>3</sub> | 1.41, s                   | 14.6                   |
| 31             | 14.8, CH <sub>3</sub> | 1.38, s                   | 14.9                   |
| 32             | 65.3, CH <sub>2</sub> | 4.16, 4.09 (m, o)         | 65.0                   |
| 33             | 20.7, CH <sub>3</sub> | 1.30 (d, 6.9)             | 20.2                   |
| 1 <sub>A</sub> | 99.4, CH              | 4.77 (d, 3.7)             | 98.4                   |
| 2 <sub>A</sub> | 30.3, CH <sub>2</sub> | 2.39, 1.73 (m, o)         | 30.3                   |
| 3 <sub>A</sub> | 68.8, CH              | 4.04 (m, o)               | 67.2                   |
| 4 <sub>A</sub> | 73.4, CH              | 3.31 (m, o)               | 72.3                   |
| 5 <sub>A</sub> | 65.3, CH              | 4.15 (m, o)               | 65.4                   |

|                      |                       |                     |                   |
|----------------------|-----------------------|---------------------|-------------------|
| <b>6<sub>A</sub></b> | 18.6, CH <sub>3</sub> | 1.26 (m, o)         | 18.6              |
| <b>1<sub>B</sub></b> | 93.2, CH              | 5.19 (d, 5.31)      | 92.0              |
| <b>2<sub>B</sub></b> | 35.9, CH <sub>2</sub> | 2.21, 2.01 (m, o)   | 36.0              |
| <b>3<sub>B</sub></b> | 68.0, CH              | 4.20 (m, o)         | 67.2              |
| <b>4<sub>B</sub></b> | 83.8, CH              | 3.31 (m, o)         | 82.6              |
| <b>5<sub>B</sub></b> | 63.6, CH              | 4.07 (m, o)         | 63.0              |
| <b>6<sub>B</sub></b> | 18.2, CH <sub>3</sub> | 1.24 (m, o)         | 17.9              |
| <b>1<sub>C</sub></b> | 100.7, CH             | 4.97 (m, o)         | 100.0             |
| <b>2<sub>C</sub></b> | 38.8, CH <sub>2</sub> | 2.06, 1.74 (m, o)   | 38.7              |
| <b>3<sub>C</sub></b> | 64.4, CH              | 4.31, s             | 63.2              |
| <b>4<sub>C</sub></b> | 83.8, CH              | 2.87 (dd, 9.6, 2.9) | 83.5              |
| <b>5<sub>C</sub></b> | 69.3, CH              | 3.97 (m, o)         | 68.6              |
| <b>6<sub>C</sub></b> | 18.3, CH <sub>3</sub> | 1.22 (m, o)         | 18.6              |
| <b>7<sub>C</sub></b> | 57.6, CH <sub>3</sub> | 3.40, s             | 56.3              |
| <b>1<sub>D</sub></b> | 97.9, CH              | 4.73 (dd, 9.7, 1.6) | 98.4              |
| <b>2<sub>D</sub></b> | 38.0, CH <sub>2</sub> | 2.07, 1.81 (m, o)   | 36.0              |
| <b>3<sub>D</sub></b> | 57.5, C               |                     | 91.6 <sup>d</sup> |
| <b>4<sub>D</sub></b> | 55.8, CH              | 3.78 (m, o)         | 54.7              |
| <b>5<sub>D</sub></b> | 69.7, CH              | 3.82 (m, o)         | 69.1              |
| <b>6<sub>D</sub></b> | 17.4, CH <sub>3</sub> | 1.18 (d, 6.2)       | 17.3              |
| <b>7<sub>D</sub></b> | 29.5, CH <sub>3</sub> | 1.33, s             | 25.3              |
| <b>8<sub>D</sub></b> | 160.0, C              |                     | 158.8             |
| <b>9<sub>D</sub></b> | 52.7, CH <sub>3</sub> | 3.70, s             | 52.3              |

<sup>a</sup> Recorded in CD<sub>3</sub>OD at 600 MHz for <sup>1</sup>H NMR, 150 MHz for <sup>13</sup>C NMR. <sup>b</sup> Recorded in pyridine-d<sub>5</sub> for <sup>13</sup>C NMR. <sup>c</sup> Overlapped. <sup>d</sup> This position connects the amino group and the chemical shift should be around 50 ppm.

---

**Table S2** The comparison of NMR data of compound **2**.

| Position       | 2 <sup>a</sup>        |                           | LOB B <sup>b</sup> [2] |
|----------------|-----------------------|---------------------------|------------------------|
|                | $\delta_C$            | $\delta_H$                | $\delta_C$             |
|                | type                  | (J in Hz)                 | type                   |
| 1              | 170.3, C              |                           | 170.1                  |
| 2              | 103.4, C              |                           | 100.3                  |
| 3              | 205.7, C              |                           | 206.0                  |
| 4              | 52.5, C               |                           | 52.5                   |
| 5              | 44.7, CH              | 2.10 (m, o <sup>c</sup> ) | 44.9                   |
| 6              | 32.4, CH              | 1.63 (m, o)               | 32.6                   |
| 7              | 42.9, CH <sub>2</sub> | 1.63, 1.56 (m, o)         | 43.1                   |
| 8              | 35.9, CH              | 2.26 (m, o)               | 36.1                   |
| 9              | 85.9, CH              | 3.45 (m, o)               | 85.9                   |
| 10             | 39.7, CH              | 2.11 (m, o)               | 39.7                   |
| 11             | 127.6, CH             | 5.85 (d, 10.1)            | 127.6                  |
| 12             | 127.4, CH             | 5.40 (m, o)               | 127.7                  |
| 13             | 54.2, CH              | 3.55 (m, o)               | 54.5                   |
| 14             | 137.2, C              |                           | 137.3                  |
| 15             | 124.8, CH             | 5.21 (d, 9.9)             | 125.1                  |
| 16             | 32.1, CH <sub>2</sub> | 2.44, 2.28 (m, o)         | 32.1                   |
| 17             | 80.1, CH              | 4.28, s                   | 80.2                   |
| 18             | 139.1, C              |                           | 139.3                  |
| 19             | 120.2, CH             | 5.19 (m, o)               | 120.4                  |
| 20             | 41.6, CH              | 3.66 (d, 11.0)            | 41.7                   |
| 21             | 123.5, CH             | 5.56, s                   | 123.6                  |
| 22             | 142.7, C              |                           | 143.0                  |
| 23             | 28.5, CH              | 2.77 (t, 6.6)             | 28.7                   |
| 24             | 36.2, CH <sub>2</sub> | 2.41, 1.81 (m, o)         | 36.3                   |
| 25             | 84.9, C               |                           | 84.9                   |
| 26             | 200.4, C              |                           | 200.5                  |
| 27             | 15.5, CH <sub>3</sub> | 1.60, s                   | 15.5                   |
| 28             | 22.9, CH <sub>3</sub> | 0.68, s                   | 22.9                   |
| 29             | 14.8, CH <sub>3</sub> | 1.16 (m, o)               | 14.8                   |
| 30             | 14.1, CH <sub>3</sub> | 1.41, s                   | 15.2                   |
| 31             | 15.2, CH <sub>3</sub> | 1.45, s                   | 14.2                   |
| 32             | 65.2, CH <sub>2</sub> | 4.22, 4.07 (m, o)         | 65.4                   |
| 33             | 20.3, CH <sub>3</sub> | 1.33 (d, 7.2)             | 20.3                   |
| 1 <sub>A</sub> | 99.7, CH              | 4.77, s                   | 99.8                   |
| 2 <sub>A</sub> | 31.0, CH <sub>2</sub> | 2.37, 1.76 (d, 14.8)      | 31.2                   |
| 3 <sub>A</sub> | 69.2, CH              | 4.04, s                   | 69.5                   |
| 4 <sub>A</sub> | 73.2, CH              | 3.32 (m, o)               | 73.5                   |
| 5 <sub>A</sub> | 65.9, CH              | 4.12 (m, o)               | 66.2                   |
| 6 <sub>A</sub> | 18.2, CH <sub>3</sub> | 1.23 (m, o)               | 17.3                   |

|                      |                       |                   |       |
|----------------------|-----------------------|-------------------|-------|
| <b>1<sub>B</sub></b> | 93.1, CH              | 5.17 (m, o)       | 93.3  |
| <b>2<sub>B</sub></b> | 35.9, CH <sub>2</sub> | 2.09, 2.01 (m, o) | 36.5  |
| <b>3<sub>B</sub></b> | 68.0, CH              | 4.21 (m, o)       | 69.2  |
| <b>4<sub>B</sub></b> | 83.3, CH              | 3.31 (m, o)       | 83.3  |
| <b>5<sub>B</sub></b> | 63.6, CH              | 4.10 (m, o)       | 63.7  |
| <b>6<sub>B</sub></b> | 18.0, CH <sub>3</sub> | 1.23 (m, o)       | 18.3  |
| <b>1<sub>C</sub></b> | 100.7, CH             | 4.96 (d, 9.7)     | 100.9 |
| <b>2<sub>C</sub></b> | 38.8, CH <sub>2</sub> | 2.07, 1.73 (m, o) | 39.0  |
| <b>3<sub>C</sub></b> | 64.4, CH              | 4.28, s           | 64.4  |
| <b>4<sub>C</sub></b> | 83.7, CH              | 2.88 (d, 9.2)     | 83.8  |
| <b>5<sub>C</sub></b> | 69.6, CH              | 3.82 (m, o)       | 69.8  |
| <b>6<sub>C</sub></b> | 18.7, CH <sub>3</sub> | 1.23 (m, o)       | 18.8  |
| <b>7<sub>C</sub></b> | 57.0, CH <sub>3</sub> | 3.40, s           | 57.0  |
| <b>1<sub>D</sub></b> | 99.0, CH              | 4.51 (d, 9.3)     | 99.1  |
| <b>2<sub>D</sub></b> | 36.3, CH <sub>2</sub> | 2.68, 1.82 (m, o) | 38.7  |
| <b>3<sub>D</sub></b> | 92.3, C               |                   | 92.6  |
| <b>4<sub>D</sub></b> | 55.2, CH              | 4.38 (m, o)       | 55.3  |
| <b>5<sub>D</sub></b> | 70.0, CH              | 3.54 (m, o)       | 70.5  |
| <b>6<sub>D</sub></b> | 17.0, CH <sub>3</sub> | 1.16 (m, o)       | 14.1  |
| <b>7<sub>D</sub></b> | 25.8, CH <sub>3</sub> | 1.55, s           | 26.0  |
| <b>8<sub>D</sub></b> | 160.0, C              |                   | 160.2 |
| <b>9<sub>D</sub></b> | 52.9, CH <sub>3</sub> | 3.72, s           | 53.1  |
| <b>D-4NH</b>         |                       | 7.25 (d, 10.0)    |       |

<sup>a</sup> Recorded in CD<sub>3</sub>OD at 600 MHz for <sup>1</sup>H NMR, 150 MHz for <sup>13</sup>C NMR. <sup>b</sup> Recorded in CD<sub>3</sub>OD at 150 MHz for <sup>13</sup>C NMR. <sup>c</sup> Overlapped.

---

**Table S3** The comparison of NMR data of compound **3**.

| Position  | <b>3<sup>a</sup></b>  |                            | <b>32-chloro-32-deoxykijanolid<sup>b</sup> [3]</b> |
|-----------|-----------------------|----------------------------|----------------------------------------------------|
|           | $\delta_c$            | $\delta_H$<br>(J in Hz)    | $\delta_c$                                         |
|           | type                  |                            | type                                               |
| <b>1</b>  | 170.2, C              |                            | 170.3                                              |
| <b>2</b>  | 103.7, C              |                            | 103.3                                              |
| <b>3</b>  | 206.2, C              |                            | 206.1                                              |
| <b>4</b>  | 52.5, C               |                            | 52.4                                               |
| <b>5</b>  | 44.5, CH              | 2.06 (m, o <sup>c</sup> )  | 32.4                                               |
| <b>6</b>  | 32.1, CH              | 1.63 (m, o)                | 28.7                                               |
| <b>7</b>  | 43.1, CH <sub>2</sub> | 1.57 (m, o)                | 43.1                                               |
| <b>8</b>  | 36.5, CH              | 2.19 (m, o)                | 40.2                                               |
| <b>9</b>  | 76.8, CH              | 3.59 (m, o)                | 76.8                                               |
| <b>10</b> | 40.4, CH              | 2.08 (m, o)                | 36.2                                               |
| <b>11</b> | 127.9, CH             | 6.07 (d, 10.2)             | 127.3                                              |
| <b>12</b> | 127.3, CH             | 5.39 (ddd, 10.2, 4.8, 2.1) | 127.9                                              |
| <b>13</b> | 54.5, CH              | 3.55 (d, 4.7)              | 54.3                                               |
| <b>14</b> | 136.9, C              |                            | 136.9                                              |
| <b>15</b> | 124.8, CH             | 5.27(t, 9.0)               | 124.5                                              |
| <b>16</b> | 36.3, CH <sub>2</sub> | 2.30, 1.81 (m, o)          | 33.0                                               |
| <b>17</b> | 73.6, CH              | 4.15, s                    | 73.5                                               |
| <b>18</b> | 141.8, C              |                            | 139.3                                              |
| <b>19</b> | 119.5, CH             | 5.27 (m, o)                | 127.3                                              |
| <b>20</b> | 41.7, CH              | 3.59 (m, o)                | 44.4                                               |
| <b>21</b> | 122.1, CH             | 5.18, s                    | 118.4                                              |
| <b>22</b> | 138.7, C              |                            | 142.5                                              |
| <b>23</b> | 36.3, CH              | 2.39 (d, 12.2)             | 41.7                                               |
| <b>24</b> | 33.0, CH <sub>2</sub> | 2.41, 2.14 (m, o)          | 36.2                                               |
| <b>25</b> | 84.7, C               |                            | 84.4                                               |
| <b>26</b> | 200.7, C              |                            | 200.8                                              |
| <b>27</b> | 15.6, CH <sub>3</sub> | 1.60, s                    | 15.3                                               |
| <b>28</b> | 22.9, CH <sub>3</sub> | 0.67 (d, 5.6)              | 23                                                 |
| <b>29</b> | 13.6, CH <sub>3</sub> | 1.04, (d, 7.1)             | 13.7                                               |
| <b>30</b> | 14.1, CH <sub>3</sub> | 1.42, s                    | 15.7                                               |
| <b>31</b> | 15.1, CH <sub>3</sub> | 1.41, s                    | 14.2                                               |
| <b>32</b> | 22.1, CH <sub>3</sub> | 1.81, s                    | - <sup>d</sup>                                     |
| <b>33</b> | 20.6, CH <sub>3</sub> | 1.28 (d, 7.2)              | 20.1                                               |

<sup>a</sup> Recorded in CD<sub>3</sub>OD at 500 MHz for <sup>1</sup>H NMR, 125 MHz for <sup>13</sup>C NMR. <sup>b</sup> Recorded in CD<sub>3</sub>OD for <sup>13</sup>C NMR. <sup>c</sup> Overlapped. <sup>d</sup> Obscured by CD<sub>3</sub>OD signal. 32-chloro-32-deoxykijanolid is replaced by chloromethyl at the 32nd position of **3**. LOB H8 was dissolved in DMSO-*d*<sub>6</sub>, so the data were not compared.



**Table S4** The comparison of NMR data of compound **4**.

| Position             | <b>4<sup>a</sup></b>  |                           | <b>O-β-D-kijanosyl-(1→17)-<br/>kijanolid<sup>b</sup> [3]</b> |
|----------------------|-----------------------|---------------------------|--------------------------------------------------------------|
|                      | <b>δ<sub>C</sub></b>  | <b>δ<sub>H</sub></b>      | <b>δ<sub>C</sub></b>                                         |
|                      | type                  | ( <i>J</i> in Hz)         | type                                                         |
| <b>1</b>             | 171.3, C              |                           | 167.1                                                        |
| <b>2</b>             | 102.5, C              |                           | 102.0                                                        |
| <b>3</b>             | 205.0, C              |                           | 206.5                                                        |
| <b>4</b>             | 52.6, C               |                           | 51.1                                                         |
| <b>5</b>             | 40.4, CH              | 2.02 (m, o <sup>c</sup> ) | 31.2                                                         |
| <b>6</b>             | 32.6, CH              | 1.56 (m, o)               | 28.0                                                         |
| <b>7</b>             | 43.2, CH <sub>2</sub> | 1.56, 1.50 (m, o)         | 41.9                                                         |
| <b>8</b>             | 36.4, CH              | 2.16 (m, o)               | 39.3                                                         |
| <b>9</b>             | 77.1, CH              | 3.54 (m, o)               | 76.1                                                         |
| <b>10</b>            | 44.7, CH              | 2.02 (m, o)               | 34.8                                                         |
| <b>11</b>            | 124.5, CH             | 6.0 (d, 10.1)             | 125.8                                                        |
| <b>12</b>            | 124, CH               | 5.32 (dd, 10.0, 4.6)      | 126.5                                                        |
| <b>13</b>            | 54.1, CH              | 3.49 (m, o)               | 53.3                                                         |
| <b>14</b>            | 137.7, C              |                           | 135.9                                                        |
| <b>15</b>            | 124.5, CH             | 5.16 (d, 9.8)             | 123.4                                                        |
| <b>16</b>            | 32.3, CH <sub>2</sub> | 2.40, 2.21 (m, o)         | 31.2                                                         |
| <b>17</b>            | 80.5, CH              | 4.20 (m, o)               | 78.6                                                         |
| <b>18</b>            | 139.3, C              |                           | 137.0                                                        |
| <b>19</b>            | 120.5, CH             | 5.12 (d, 10.5)            | 121.5                                                        |
| <b>20</b>            | 41.7, CH              | 3.67 (m, o)               | 42.9                                                         |
| <b>21</b>            | 124, CH               | 5.48, s                   | 119.4                                                        |
| <b>22</b>            | 142.7, C              |                           | 141.5                                                        |
| <b>23</b>            | 28.7, CH              | 2.68 (t, 6.9)             | 40.3                                                         |
| <b>24</b>            | 36.4, CH <sub>2</sub> | 2.35, 1.78 (m, o)         | 35.4                                                         |
| <b>25</b>            | 85.1, C               |                           | 83.3                                                         |
| <b>26</b>            | 200.7, C              |                           | 201.5                                                        |
| <b>27</b>            | 15.7, CH <sub>3</sub> | 1.53, s                   | 15.0                                                         |
| <b>28</b>            | 23.2, CH <sub>3</sub> | 0.61 (d, 4.2)             | 22.3                                                         |
| <b>29</b>            | 13.8, CH <sub>3</sub> | 0.99 (d, 7.1)             | 13.0                                                         |
| <b>30</b>            | 14.3, CH <sub>3</sub> | 1.35, s                   | 15.2                                                         |
| <b>31</b>            | 15.4, CH <sub>3</sub> | 1.38, s                   | 13.7                                                         |
| <b>32</b>            | 65.4, CH <sub>2</sub> | 4.17, 4.01 (d, 12.8)      | 64.9                                                         |
| <b>33</b>            | 20.5, CH <sub>3</sub> | 1.27 (d, 7.3)             | 20.2                                                         |
| <b>1<sub>D</sub></b> | 99.2, CH              | 4.47 (d, 9.6)             | 97.1                                                         |
| <b>2<sub>D</sub></b> | 36.6, CH <sub>2</sub> | 2.62 (d, 14.3)            | 35.8                                                         |
| <b>3<sub>D</sub></b> | 92.5, C               | 1.80 (m, o)               | 91.2                                                         |
| <b>4<sub>D</sub></b> | 55.4, CH              |                           | 53.8                                                         |
| <b>5<sub>D</sub></b> | 70.4, CH              | 4.31 (d, 9.7)             | 69.2                                                         |

|                      |                       |               |       |
|----------------------|-----------------------|---------------|-------|
| <b>6<sub>D</sub></b> | 17.4, CH <sub>3</sub> | 3.48 (m, o)   | 17.0  |
| <b>7<sub>D</sub></b> | 26.0, CH <sub>3</sub> | 1.09 (d, 6.1) | 25.3  |
| <b>8<sub>D</sub></b> | 160.3, C              | 1.49, s       | 157.4 |
| <b>9<sub>D</sub></b> | 53.2, CH <sub>3</sub> |               | 52.6  |
| <b>D-4NH</b>         |                       | 3.65, s       |       |

<sup>a</sup> Recorded in CD<sub>3</sub>OD at 400 MHz for <sup>1</sup>H NMR, 101 MHz for <sup>13</sup>C NMR. <sup>b</sup> Recorded in CDCl<sub>3</sub> for <sup>13</sup>C NMR. <sup>c</sup> overlapped.

---

**Table S5** AntiSMASH-predicted BGCs for *S. sp.* CB09030.

| Region           | Type                   | Position         |                  | Product                                                   |
|------------------|------------------------|------------------|------------------|-----------------------------------------------------------|
|                  |                        | From             | To               |                                                           |
| Region 1         | Lanthipeptide-class II | 307,397          | 335,569          | SBI-06990 A1, SBI-06990 A2                                |
| Region 2         | NRPS                   | 1,236,052        | 1,289,155        | ishigamide                                                |
| Region 3         | Betalactone            | 1,406,082        | 1,431,639        | julichrome Q3-3, julichrome Q3-5                          |
| Region 4         | Terpene                | 1,447,488        | 1,466,387        | albaflavenone                                             |
| Region 5         | T2PKS                  | 1,529,493        | 1,598,257        | spore pigment                                             |
| Region 6         | Siderophore            | 2,067,208        | 2,077,382        | \                                                         |
| Region 7         | Lanthipeptide-class-i  | 2,159,332        | 2,181,980        | SapB                                                      |
| Region 8         | T2PKS, PKS-like, NRPS  | 2,208,262        | 2,294,786        | olimycin A, olimycin B                                    |
| Region 9         | NRPS, T1PKS            | 2,354,409        | 2,401,914        | xiamycin A                                                |
| Region 10        | RiPP-like              | 2,437,839        | 2,449,111        | cyclothiazomycin                                          |
| Region 11        | Terpene                | 2,478,990        | 2,500,577        | geosmin                                                   |
| Region 12        | Siderophore            | 2,657,445        | 2,670,619        | \                                                         |
| Region 13        | NRPS                   | 2,714,868        | 2,758,137        | diisonitrile antibiotic SF2768                            |
| Region 14        | NRPS, Nucleoside       | 2,809,938        | 2,852,748        | nogalamycin                                               |
| Region 15        | Terpene, NRPS          | 3,162,527        | 3,235,065        | hopene                                                    |
| Region 16        | NRPS, T1PKS, NRPS-like | 3,283,414        | 3,409,750        | divergolide A-D                                           |
| Region 17        | NRPS                   | 3,455,294        | 3,518,212        | cyclomarin D                                              |
| Region 18        | Terpene                | 3,785,165        | 3,803,571        | versipelostatin                                           |
| Region 19        | RiPP-like              | 3,815,011        | 3,825,226        | informatipeptin                                           |
| Region 20        | NRPS                   | 4,046,857        | 4,096,234        | coelichelin                                               |
| Region 21        | T1PKS                  | 4,222,195        | 4,308,855        | elaiophylin                                               |
| <b>Region 22</b> | <b>T1PKS, NRPS</b>     | <b>4,329,164</b> | <b>4,544,509</b> | <b>lobophorin A</b>                                       |
| Region 23        | Terpene                | 4,562,586        | 4,582,407        | ebelactone                                                |
| Region 24        | T3PKS                  | 4,615,541        | 4,656,093        | germicidin                                                |
| Region 25        | Indole                 | 4,802,524        | 4,823,660        | 5-isoprenylindole-3-carboxylate $\beta$ -D-glycosyl ester |
| Region 26        | Terpene                | 4,876,326        | 4,900,561        | carotenoid                                                |
| Region 27        | Amglyccycl             | 5,152,346        | 5,173,584        | $\beta$ -D-galactosylvalidoxylamine-A                     |
| Region 28        | T3PKS                  | 5,387,878        | 5,428,990        | herboxidiene                                              |
| Region 29        | NRPS                   | 5,500,600        | 5,554,020        | rimosamide                                                |
| Region 30        | Ectoine                | 6,078,187        | 6,088,585        | ectoine                                                   |
| Region 31        | Melanin                | 7,076,380        | 7,087,006        | istamycin                                                 |
| Region 32        | Lasso peptide          | 7,146,748        | 7,169,269        | SSV-2083                                                  |
| Region 33        | Lanthipeptide-class-i  | 7,717,072        | 7,743,529        | \                                                         |
| Region 34        | Phenazine              | 7,926,118        | 7,946,558        | \                                                         |

**Table S6** Deduced function of open reading frames (ORFs) in the *lob* BGC.

| ORF             | Size<br>(aa) | Proposed Function                                                      | <i>Streptomyces</i> sp. SCSIO 01127 |                   | <i>Streptomyces olivaceus</i> SCSIO T05 |                   | <i>Streptomyces</i> sp. FXJ 7.023 |                   |
|-----------------|--------------|------------------------------------------------------------------------|-------------------------------------|-------------------|-----------------------------------------|-------------------|-----------------------------------|-------------------|
|                 |              |                                                                        | ID/SI (%)                           | Protein Homologue | ID/SI (%)                               | Protein Homologue | ID/SI (%)                         | Protein Homologue |
| <i>Orf</i> (-2) | 393          | macrolide glycosyltransferase                                          | 98/98                               | AGI99472.1        | 98/98                                   | QFU80876.1        | 98/98                             | AGC09509.1        |
| <i>Orf</i> (-1) | 260          | FkbM family methyltransferase                                          | 97/98                               | AGI99473.1        | 97/98                                   | QFU80877.1        | 97/98                             | AGC09508.1        |
| <i>lobR1</i>    | 195          | TetR type regulatory protein                                           | 96/96                               | AGI99474.1        | 96/96                                   | QFU80878.1        | 95/94                             | AGC09507.1        |
| <i>lobT1</i>    | 497          | efflux permease                                                        | 99/99                               | AGI99475.1        | 99/99                                   | QFU80879.1        | 99/99                             | AGC09506.1        |
| <i>lobP1</i>    | 392          | p450 monooxygenase                                                     | 98/99                               | AGI99476.1        | 98/99                                   | QFU80880.1        | 98/98                             | AGC09505.1        |
| <i>lobU1</i>    | 326          | aldo/keto reductase                                                    | 99/100                              | AGI99477.1        | 99/100                                  | QFU80881.1        | 99/100                            | AGC09504.1        |
| <i>lobS1</i>    | 272          | sugar-O-methyltransferase                                              | 99/100                              | AGI99478.1        | 99/100                                  | QFU80882.1        | 100/100                           | AGC09503.1        |
| <i>lobS2</i>    | 384          | sugar 4-aminotransferase                                               | 98/98                               | AGI99479.1        | 98/98                                   | QFU80883.1        | 98/98                             | AGC09502.1        |
| <i>lobS3</i>    | 266          | SAM-dependent methyltransferase                                        | 99/99                               | AGI99480.1        | 99/98                                   | QFU80884.1        | 99/99                             | AGC09501.1        |
| <i>lobG1</i>    | 391          | glycosyltransferase                                                    | 99/99                               | AGI99481.1        | 99/99                                   | QFU80886.1        | 98/98                             | AGC09500.1        |
| <i>lobA1</i>    | 3936         | TI-PKS                                                                 | 93/93                               | AGI99482.1        | 93/93                                   | QFU80887.1        | 98/98                             | AGC09499.1        |
| <i>lobS4</i>    | 483          | sugar 2,3-dehydratase                                                  | 98/98                               | AGI99483.1        | 98/98                                   | QFU80888.1        | 98/98                             | AGC09498.1        |
| <i>lobB</i>     | 253          | thioesterase                                                           | 99/99                               | AGI99484.1        | 99/99                                   | QFU80889.1        | 99/100                            | AGC09497.1        |
| <i>lobP2</i>    | 506          | FAD-dependent oxidoreductase                                           | 98/99                               | AGI99485.1        | 98/99                                   | QFU80890.1        | 99/99                             | AGC09496.1        |
| <i>lobG2</i>    | 416          | glycosyltransferase                                                    | 99/99                               | AGI99486.1        | 99/100                                  | QFU80891.1        | 99/99                             | AGC09495.1        |
| <i>lobG3</i>    | 400          | glycosyltransferase                                                    | 99/99                               | AGI99487.1        | 99/100                                  | QFU80892.1        | 99/99                             | AGC09494.1        |
| <i>lobR2</i>    | 274          | TetR-type regulatory protein                                           | 97/99                               | AGI99488.1        | \                                       | \                 | 99/99                             | AGC09493.1        |
| <i>lobC1</i>    | 616          | hydrolase superfamily dihydrolipoamide<br>acyltransferase-like protein | 97/98                               | AGI99489.1        | 99/99                                   | QFU80893.1        | 97/98                             | AGC09492.1        |
| <i>lobC2</i>    | 75           | ACP                                                                    | 100/100                             | AGI99490.1        | 99/100                                  | QFU80894.1        | 99/100                            | AGC09491.1        |

|               |      |                                           |         |            |                |                          |         |            |
|---------------|------|-------------------------------------------|---------|------------|----------------|--------------------------|---------|------------|
| <i>lobC3</i>  | 621  | FkbH-like protein                         | 98/98   | AGI99491.1 | 99/100         | QFU80895.1               | 98/99   | AGC09490.1 |
| <i>lobC4</i>  | 352  | ketoacyl acylcarrier protein synthase III | 99/98   | AGI99492.1 | 99/99          | QFU80896.1               | 98/98   | AGC09489.1 |
| <i>lobP3</i>  | 492  | FAD-dependent oxidoreductase              | 98/99   | AGI99493.1 | 98/99          | QFU80897.1               | 98/99   | AGC09488.1 |
| <i>lobA2</i>  | 1590 | TI-PKS                                    | 94/95   | AGI99494.1 | 99/99          | QFU80898.1               | 95/95   | AGC09487.1 |
| <i>lobA3</i>  | 1815 | TI-PKS                                    | 84/87   | AGI99495.1 | 98/98          | QFU80899.1               | 83/87   | AGC09486.1 |
| <i>lobA4</i>  | 7449 | TI-PKS                                    | 95/95   | AGI99496.1 | 99/98<br>97/97 | QFU80900.1<br>QFU80901.1 | 95/95   | AGC09485.1 |
| <i>lobA5</i>  | 6363 | TI-PKS                                    | 97/97   | AGI99497.1 | 98/98          | QFU80902.1               | 97/97   | AGC09484.1 |
| <i>lobU2</i>  | 133  | unknown                                   | 97/98   | AGI99498.1 | 100/100        | QFU80903.1               | 98/98   | AGC09483.1 |
| <i>lobS5</i>  | 414  | sugar 3-C-methyl transferase              | 98/99   | AGI99499.1 | 99/99          | QFU80904.1               | 99/99   | AGC09482.1 |
| <i>lobS6</i>  | 373  | sugar 3-aminotransferase                  | 98/98   | AGI99500.1 | 99/100         | QFU80905.1               | 98/98   | AGC09481.1 |
| <i>lobS7</i>  | 439  | FAD-dependent oxidoreductase              | 99/99   | AGI99501.1 | 99/100         | QFU80906.1               | 99/99   | AGC09480.1 |
| <i>lobS8</i>  | 344  | sugar 4,6-dehydratase                     | 99/99   | AGI99502.1 | 99/99          | QFU80907.1               | 99/99   | AGC09479.1 |
| <i>lobS9</i>  | 298  | sugar nucleotidyltransferase              | 98/99   | AGI99503.1 | 99/100         | QFU80908.1               | 99/99   | AGC09478.1 |
| <i>lobS10</i> | 332  | sugar 3-ketoreductase                     | 99/99   | AGI99504.1 | 99/99          | QFU80909.1               | 99/99   | AGC09477.1 |
| <i>lobS11</i> | 202  | sugar 5-epimerase                         | 99/100  | AGI99505.1 | 99/100         | QFU80910.1               | 99/100  | AGC09476.1 |
| <i>lobR3</i>  | 274  | TetR type regulatory protein              | 99/99   | AGI99506.1 | 99/100         | QFU80911.1               | 99/99   | AGC09475.1 |
| <i>lobT2</i>  | 128  | nuclear transport factor 2 family protein | 99/98   | AGI99507.1 | 99/100         | QFU80912.1               | /       | /          |
| <i>lobR4</i>  | 134  | reductase/alcohol dehydrogenase           | 98/99   | AGI99508.1 | 99/100         | QFU80913.1               | 100/100 | AGC09473.1 |
| <i>lobR5</i>  | 975  | reductase/alcohol dehydrogenase           | 99/100  | AGI99509.1 | 99/100         | QFU80914.1               | 100/100 | AGC09472.1 |
| <i>orf1</i>   | 385  | acetyltransferase                         | 100/100 | AGI99510.1 | 100/100        | QFU80915.1               | 99/100  | AGC09471.1 |

**Table S7** The antibacterial activities of LOBs.

| The antibacterial activities of LOBs (MIC, µg/mL) |                        |                    |                                |                                      |             |
|---------------------------------------------------|------------------------|--------------------|--------------------------------|--------------------------------------|-------------|
| Compounds                                         | <i>M. tuberculosis</i> | <i>B. subtilis</i> | <i>S. aureus</i><br>ATCC 29213 | <i>B. thuringensis</i><br>SCSIO BT01 | References  |
| LOB A                                             | 32                     | 12.5/0.5/16        | >128                           | 16                                   | [2] [4] [5] |
| LOB B                                             | 16                     | 1.56/0.25/0.5      | 64                             | 2                                    | [2] [4] [5] |
| LOB C                                             | -                      | -                  | -                              | -                                    | [6]         |
| LOB D                                             | -                      | -                  | -                              | -                                    | [6]         |
| LOB E                                             | -                      | 0.25               | 32/16                          | -                                    | [7] [13]    |
| LOB F                                             | -                      | -                  | 8                              | -                                    | [7]         |
| LOB G                                             | 32                     | 3.125              | >50                            | -                                    | [2]         |
| LOB H                                             | -                      | 1.57               | 50                             | -                                    | [8]         |
| LOB I                                             | -                      | 50                 | >100                           | -                                    | [8]         |
| LOB J                                             | -                      | -                  | -                              | -                                    | [9]         |
| LOB K                                             | -                      | -                  | -                              | -                                    | [10]        |
| LOB L                                             | -                      | -                  | >128                           | -                                    | [4]         |
| LOB CR1                                           | -                      | -                  | -                              | -                                    | [11]        |
| LOB CR2                                           | -                      | -                  | -                              | -                                    | [11]        |
| LOB CR3                                           | -                      | -                  | -                              | -                                    | [11]        |
| LOB CR4                                           | -                      | 8                  | 64                             | -                                    | [11] [12]   |
| LOB H1                                            | -                      | > 64               | > 64                           | -                                    | [5]         |
| LOB H2                                            | -                      | > 64               | > 64                           | -                                    | [5]         |
| LOB H3                                            | -                      | > 64               | 64                             | -                                    | [5]         |
| LOB H4                                            | -                      | 32                 | 32                             | -                                    | [5]         |
| LOB H5                                            | -                      | > 64               | > 64                           | -                                    | [5]         |
| LOB H6                                            | -                      | > 64               | > 64                           | -                                    | [5]         |
| LOB H7                                            | -                      | 4                  | 4                              | -                                    | [5]         |
| LOB H8                                            | -                      | > 64               | 64                             | -                                    | [5]         |
| LOB H9                                            | -                      | 16                 | 32                             | -                                    | [5]         |
| LOB H10                                           | -                      | > 64               | > 64                           | -                                    | [5]         |
| LOB H11                                           | -                      | 32                 | 32                             | -                                    | [5]         |
| LOB H12                                           | -                      | 8                  | 8                              | -                                    | [5]         |
| LOB H13                                           | -                      | > 64               | > 64                           | -                                    | [5]         |
| LOB H14                                           | -                      | 64                 | 64                             | -                                    | [5]         |
| LOB H15                                           | -                      | 16                 | > 64                           | -                                    | [5]         |
| LOB N1                                            | -                      | 0.5                | 32                             | -                                    | [13]        |
| LOB N2                                            | -                      | 1                  | > 64                           | -                                    | [13]        |
| LOB N3                                            | -                      | 0.5                | > 64                           | -                                    | [13]        |

-: No cytotoxicity observed or no test

**Figure S1** Anti-mycobacterial bioassay of the individual fermentation products. (A) The activity was measured by paper disk assay on the 27<sup>th</sup> day; *Streptomyces* strains that produced a bacteriostatic zone were circled in red. (B) HPLC analyses of the fermentation products. (i) blank control medium; (ii) *S. sp.* CB09030 fermentation medium; (iii) *S. sp.* CB00657 fermentation medium; (iv) *S. sp.* CB01580 fermentation medium; (v) *S. sp.* CB02366 fermentation medium.

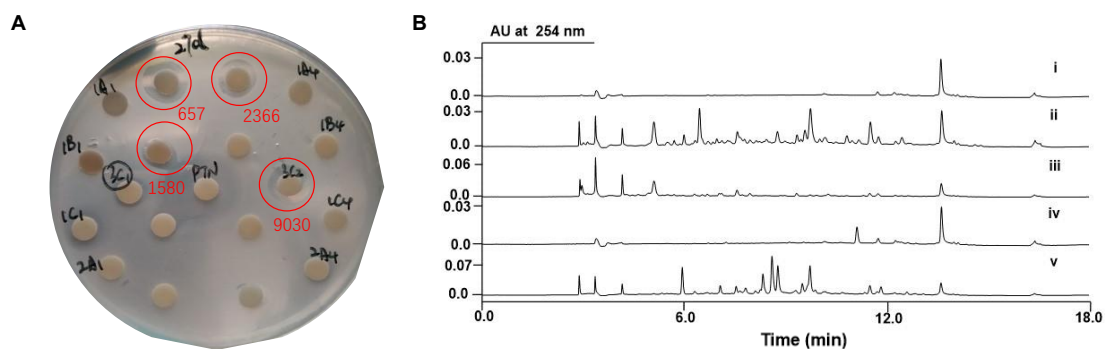

**Figure S2** The purified compounds **1–4**. (A) HPLC analyses of the crude extract and purified **1–3**. “ x ” refers to residual peaks from the chromatographic column. (B) UPLC analyses and HRMS of **4** from the hydrolysis of **2**.

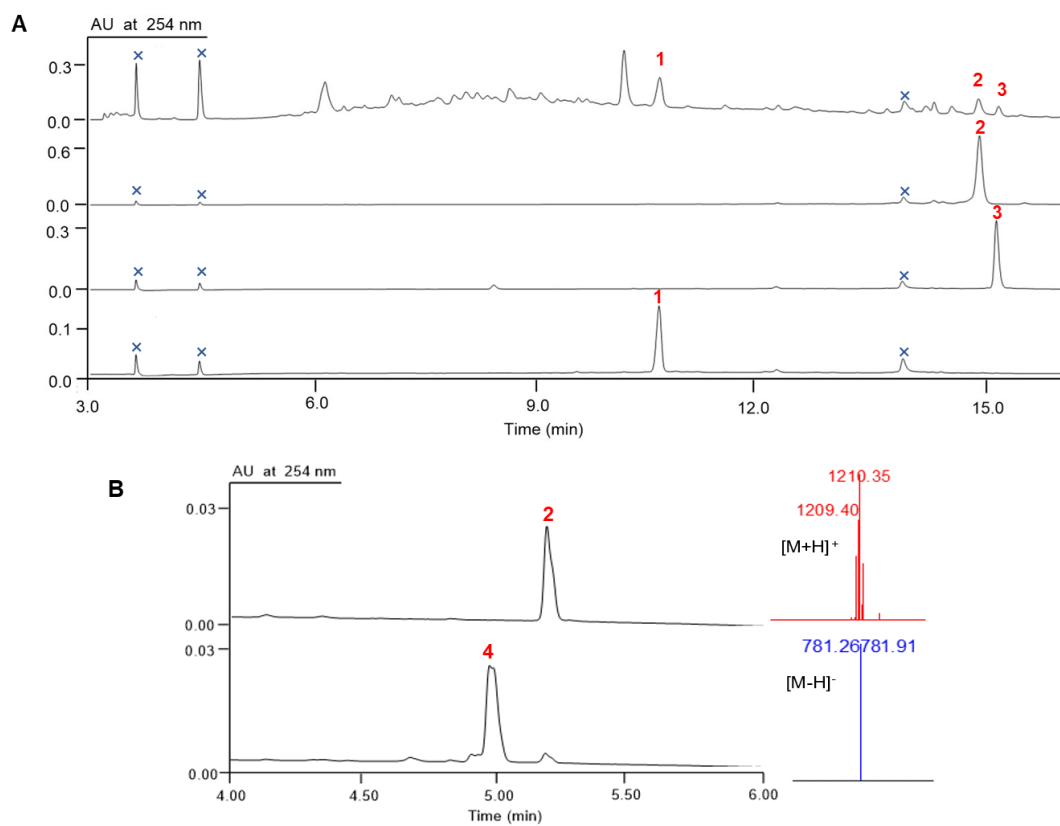



**Figure S3** AntiSMASH-predicted BGCs of putative natural products encoded in the genome of *S. sp.* CB09030.

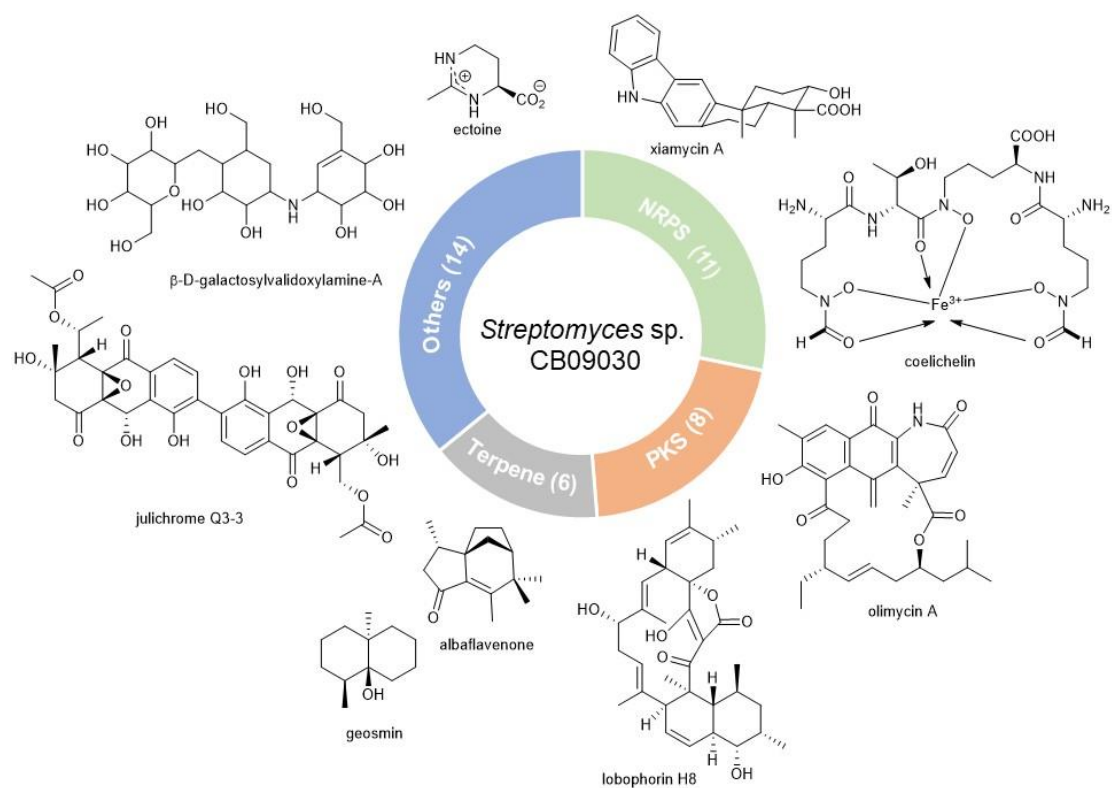

**Figure S4** Sequence analysis of glycosyltransferases from three *Streptomyces* spp. (A) Phylogenetic tree of LobG1 from *S. sp.* CB09030, LobG1 (AGI99481.1) from *S. sp.* SCSIO 01127 and LobG1 (QFU80886.1) from *S. olivaceus* SCSIO T05. LobG2 (AGI99486.1) and LobG3 (AGI99487.1) from *S. sp.* SCSIO 01127; LobG2 (QFU80891.1) and LobG3 (QFU80892.1) from *S. olivaceus* SCSIO T05. Phylogenetic trees were constructed by MEGA 7.0 software. (B) Organization of the LOB biosynthetic gene cluster in three *Streptomyces* strains. Glycosyltransferases were highlighted in red and type I PKS were drew disproportionately in light grey.

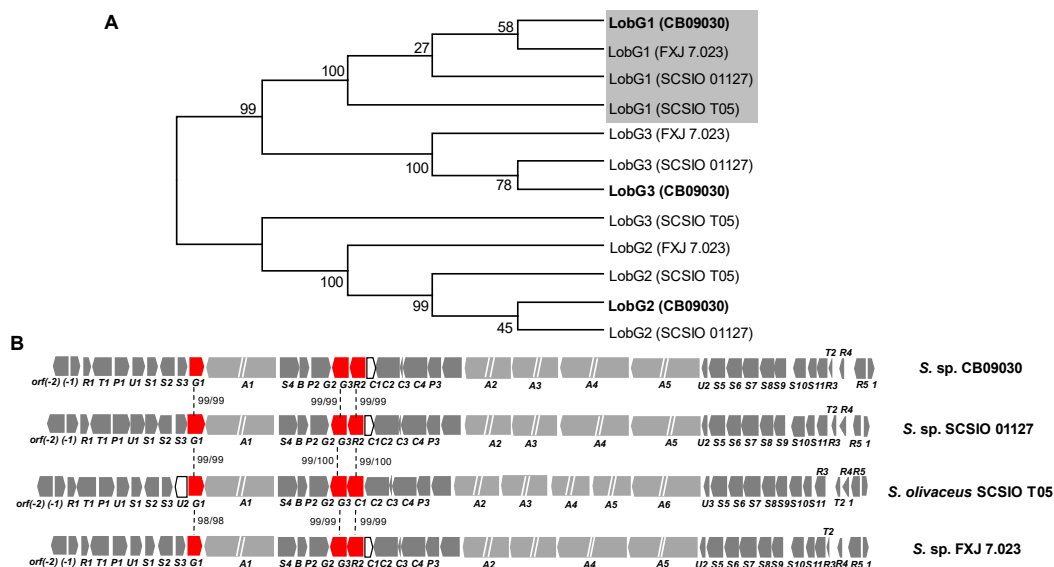

**Figure S5** Antibacterial assays of compounds **1** – **4** against *M. smegmatis* MC<sup>2</sup> 155 and *B. subtilis* 62305 using broth dilution assay. “–” means 200  $\mu$ L of bacterial solution as negative control; “+” means 200  $\mu$ L untreated media as positive control; “**A**”: *M. smegmatis* MC<sup>2</sup> 155; “**B**”: *B. subtilis* 62305. *RIF*: rifampicin, *AMP*: ampicillin.

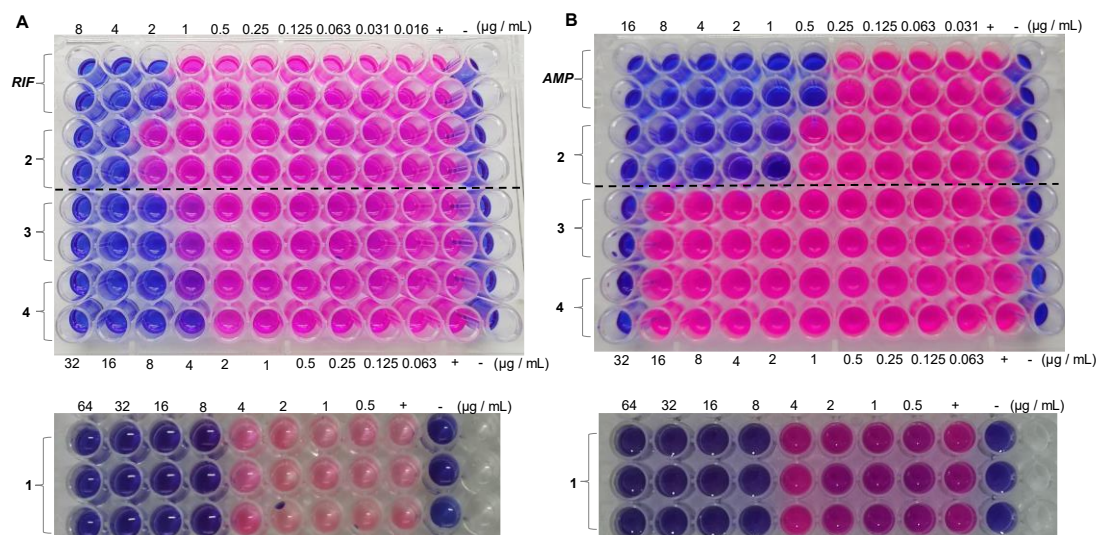

**Figure S6** The cytotoxicity of compound **1** against NCM-460 cells and 4T-1 cells by the MTT assay.

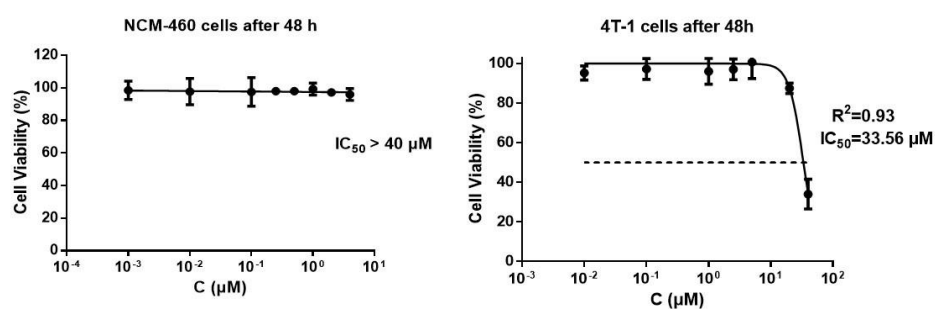

**Figure S7** The HMRS and MS/MS of compound **1**.

The HRMS of compound **1**

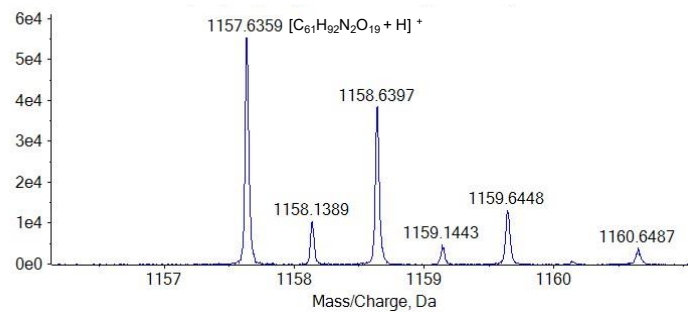

| # | Analyte Peak Name | Accuracy | Ion Ratio | Formula                                                        | Precursor Mass | Accuracy Acceptance | Concentration Acceptance | Found At Mass | Mass Error (ppm) | Library Hit             | Library Score | Isotope Ratio Difference |
|---|-------------------|----------|-----------|----------------------------------------------------------------|----------------|---------------------|--------------------------|---------------|------------------|-------------------------|---------------|--------------------------|
| 1 | ShiJie01+H        | N/A      | N/A       | C <sub>61</sub> H <sub>92</sub> N <sub>2</sub> O <sub>19</sub> | 1157.637       | Pass                | Pass                     | 1157.6359     | -0.7             | No data for Library Hit | N/A           | 3.2                      |
| 2 | ShiJie01+Na       | N/A      | N/A       | C <sub>61</sub> H <sub>92</sub> N <sub>2</sub> O <sub>19</sub> | 1179.619       | Pass                | Pass                     | 1179.6178     | -0.7             | No data for Library Hit | N/A           | 3.0                      |

The MS/MS of compound **1**

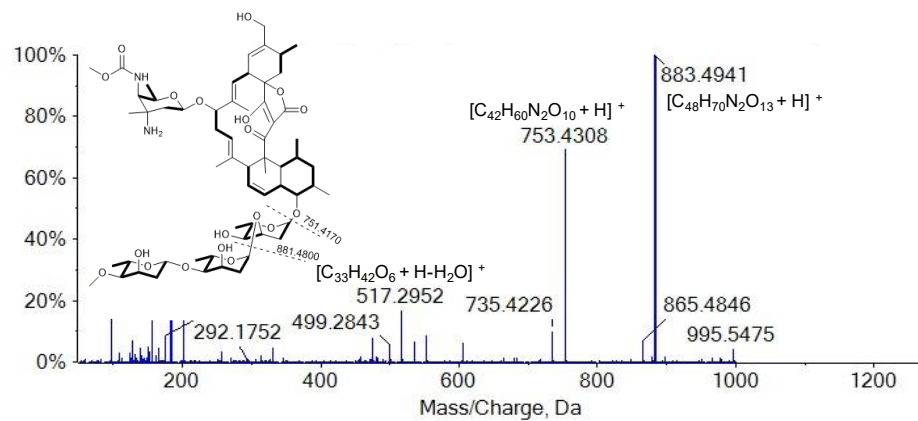

**Figure S8** The MS/MS of compound **2**.

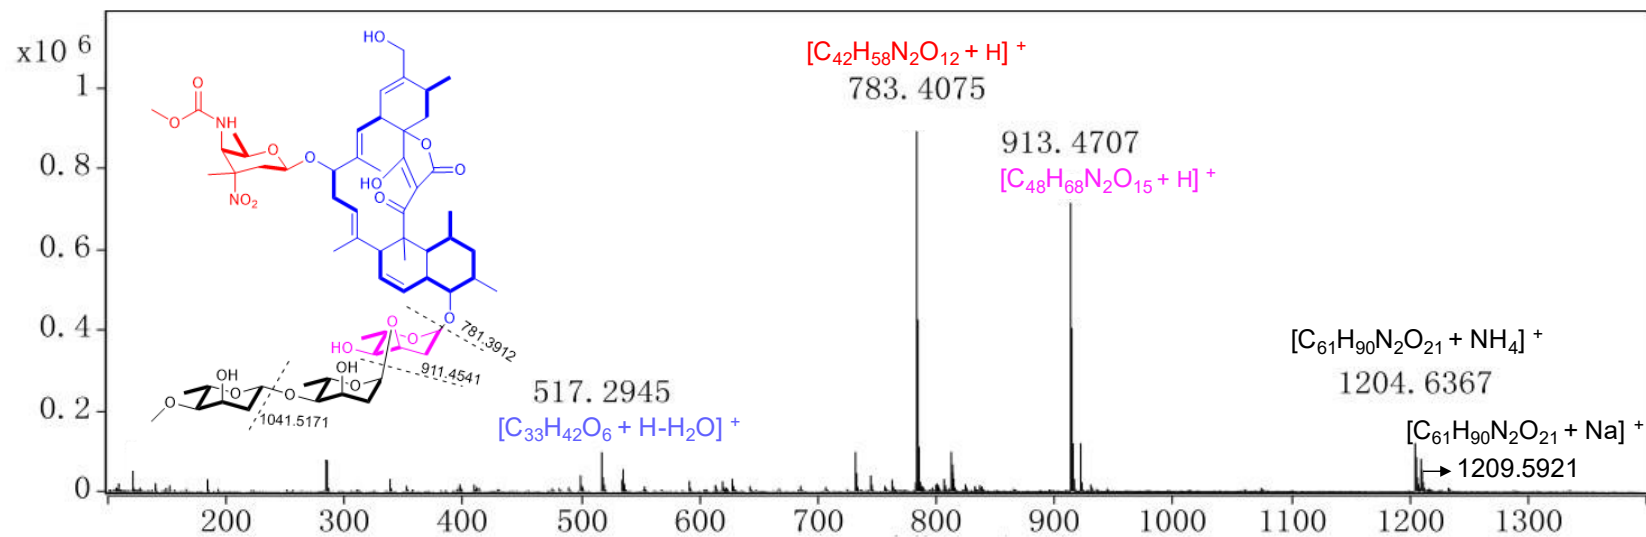

**Figure S9** The HRMS of compound **3**.

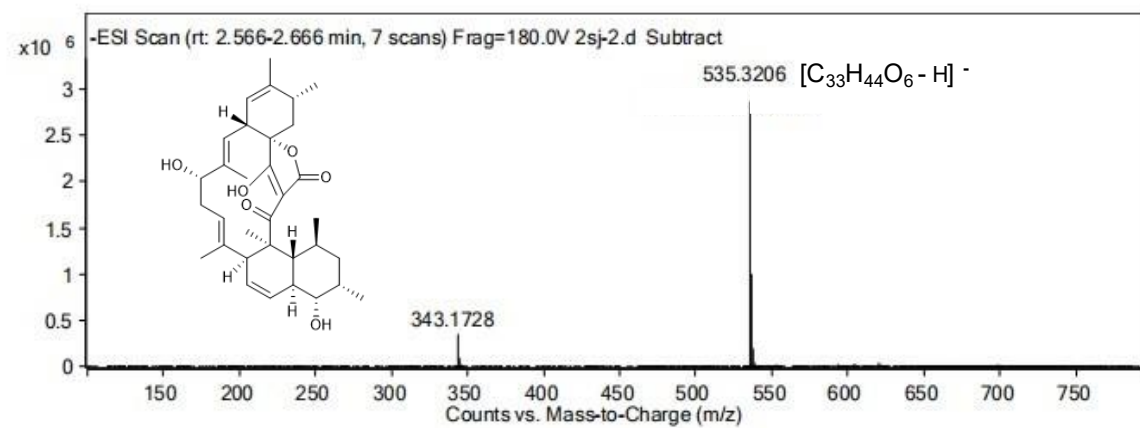

**Figure S10** The HRMS of compound **4**.

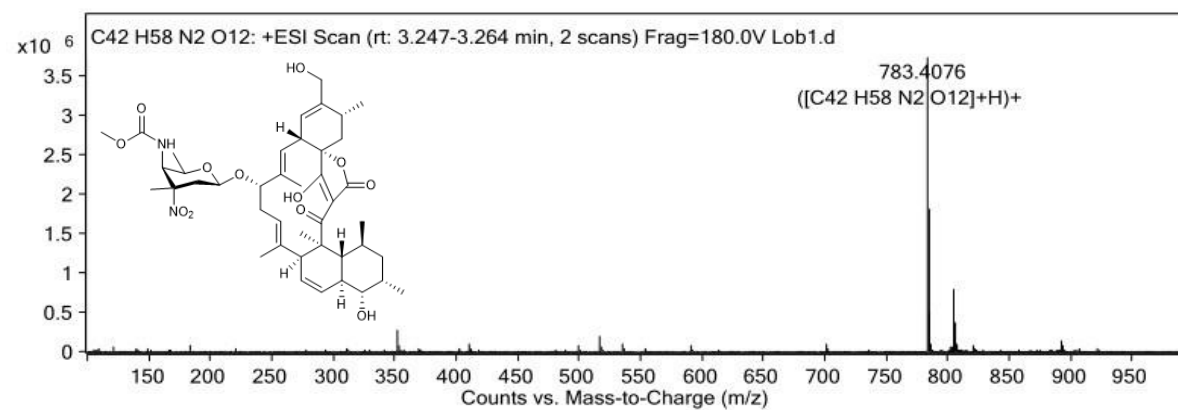

**Figure S11**  $^1\text{H}$ -NMR spectrum of **1** in  $\text{CD}_3\text{OD}$  (400 MHz).

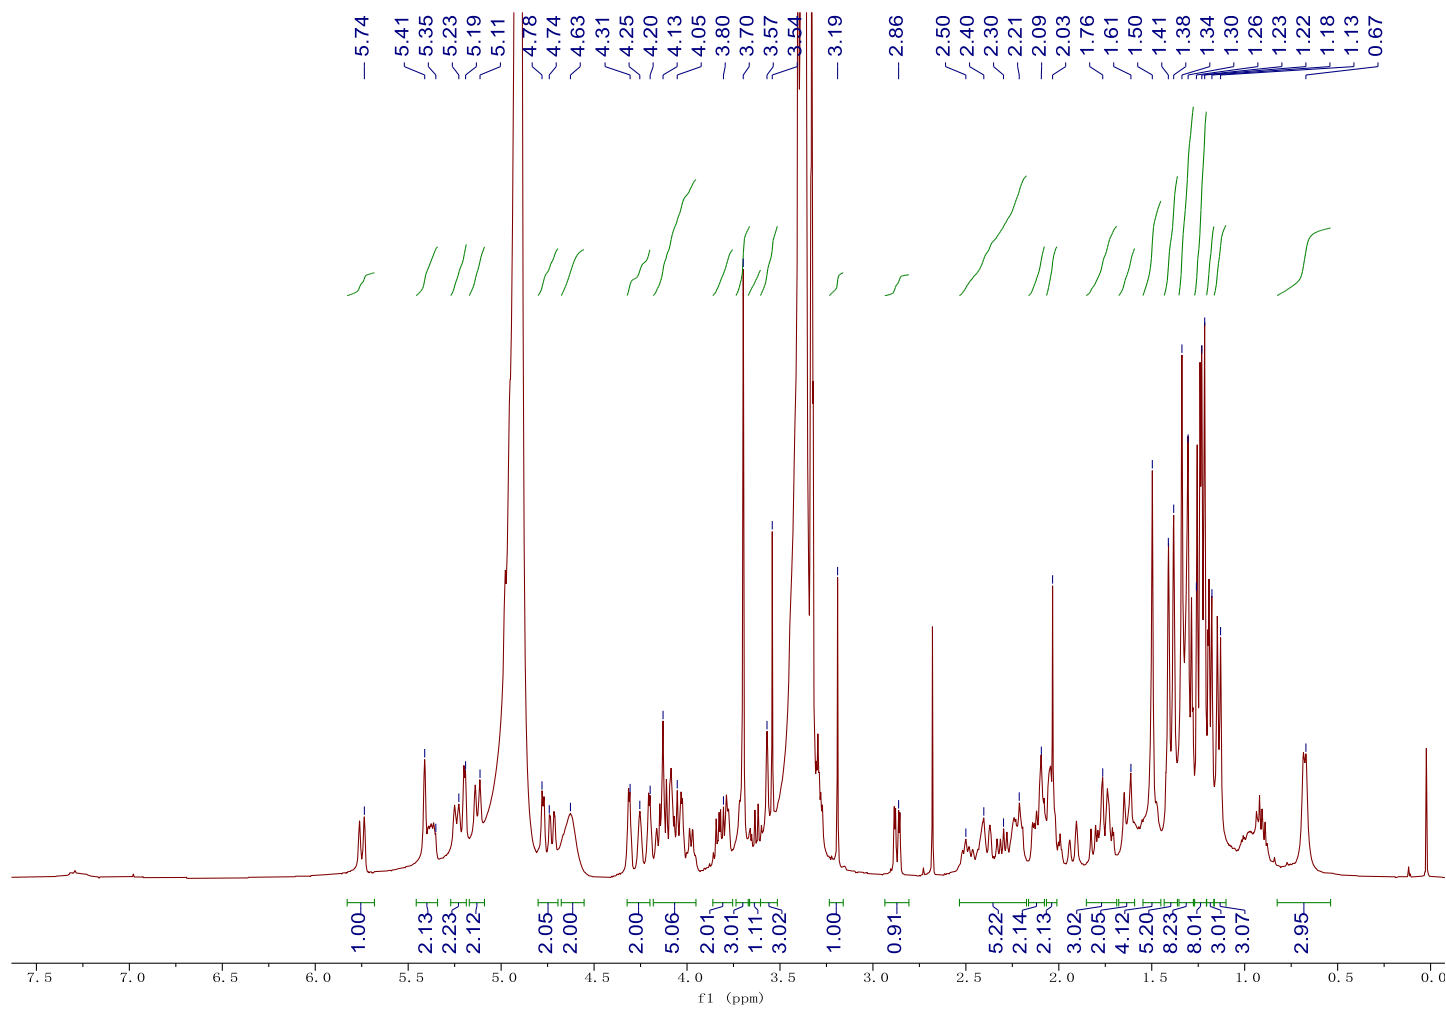

**Figure S12**  $^{13}\text{C}$  NMR spectrum of **1** in  $\text{CD}_3\text{OD}$  (100 MHz).

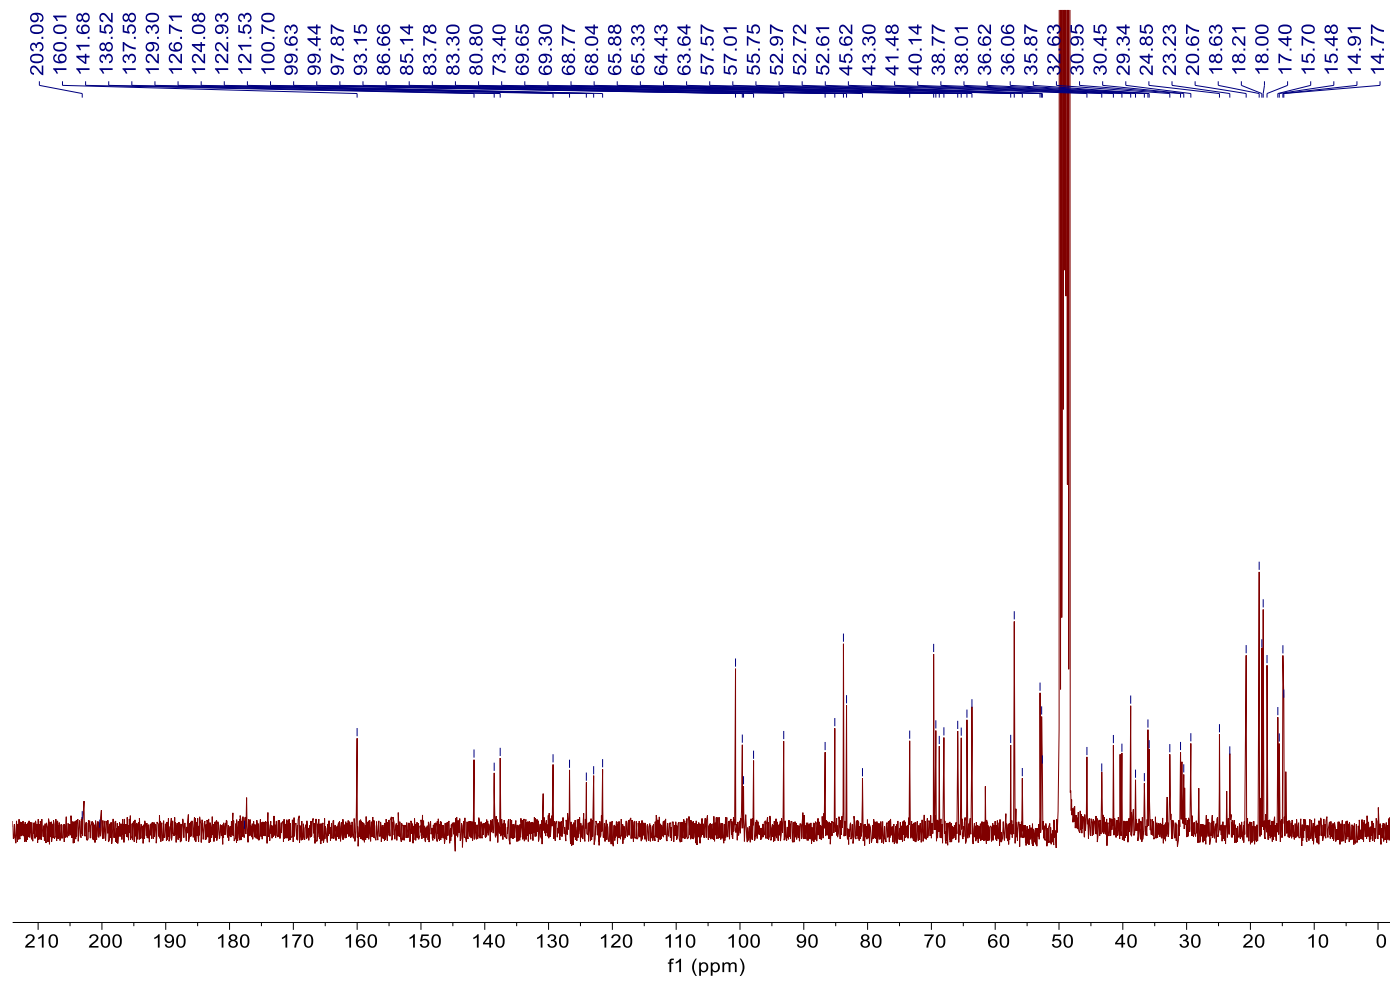



**Figure S13**  $^1\text{H}$  NMR spectrum of **2** in  $\text{CD}_3\text{OD}$  (600 MHz).

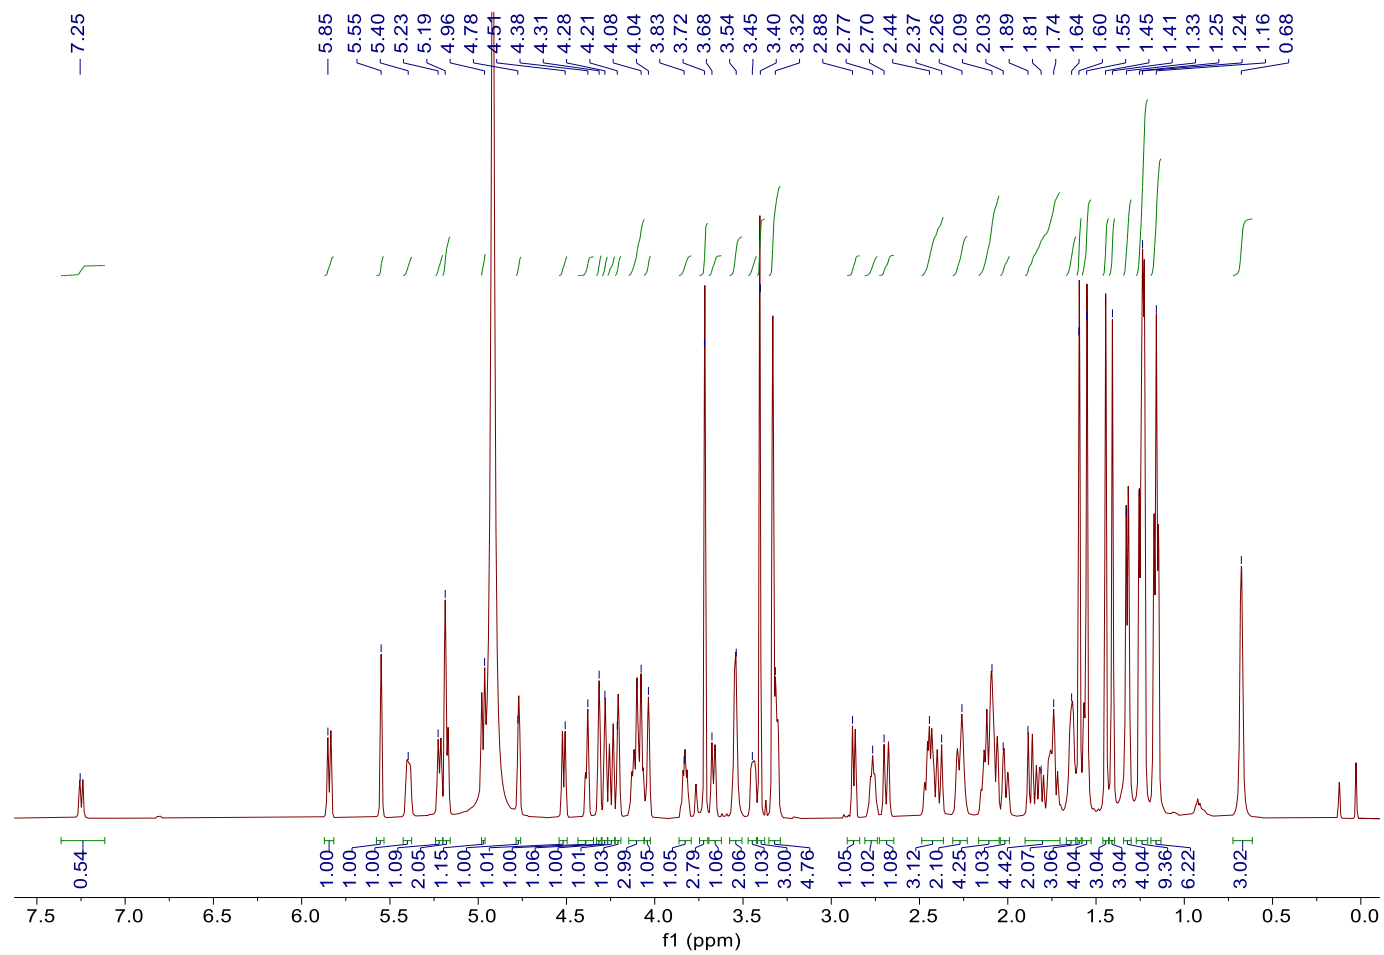

**Figure S14**  $^{13}\text{C}$  NMR spectrum of **2** in  $\text{CD}_3\text{OD}$  (150 MHz).

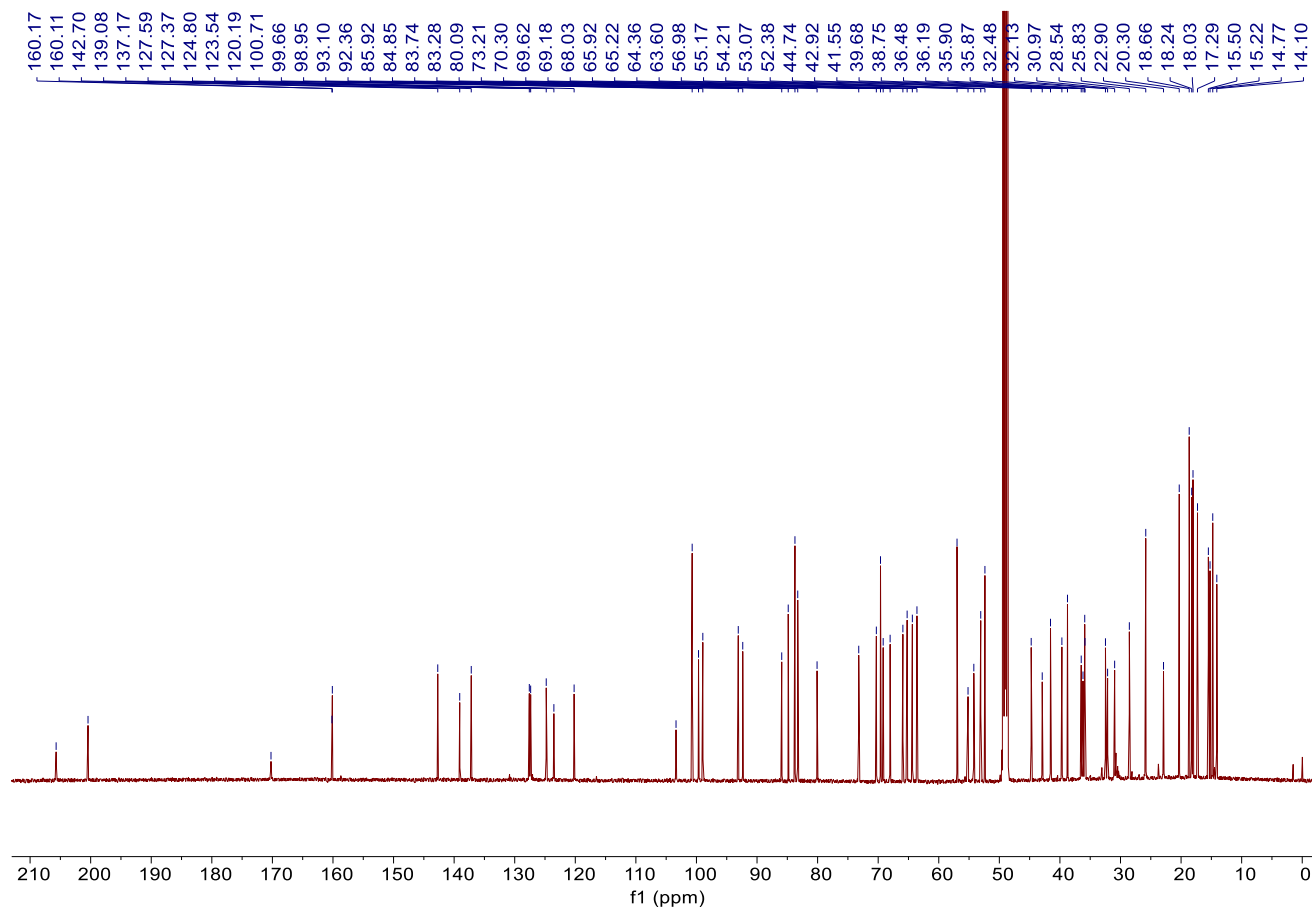

**Figure S15** DEPT 90 spectrum of **2** in CD<sub>3</sub>OD.

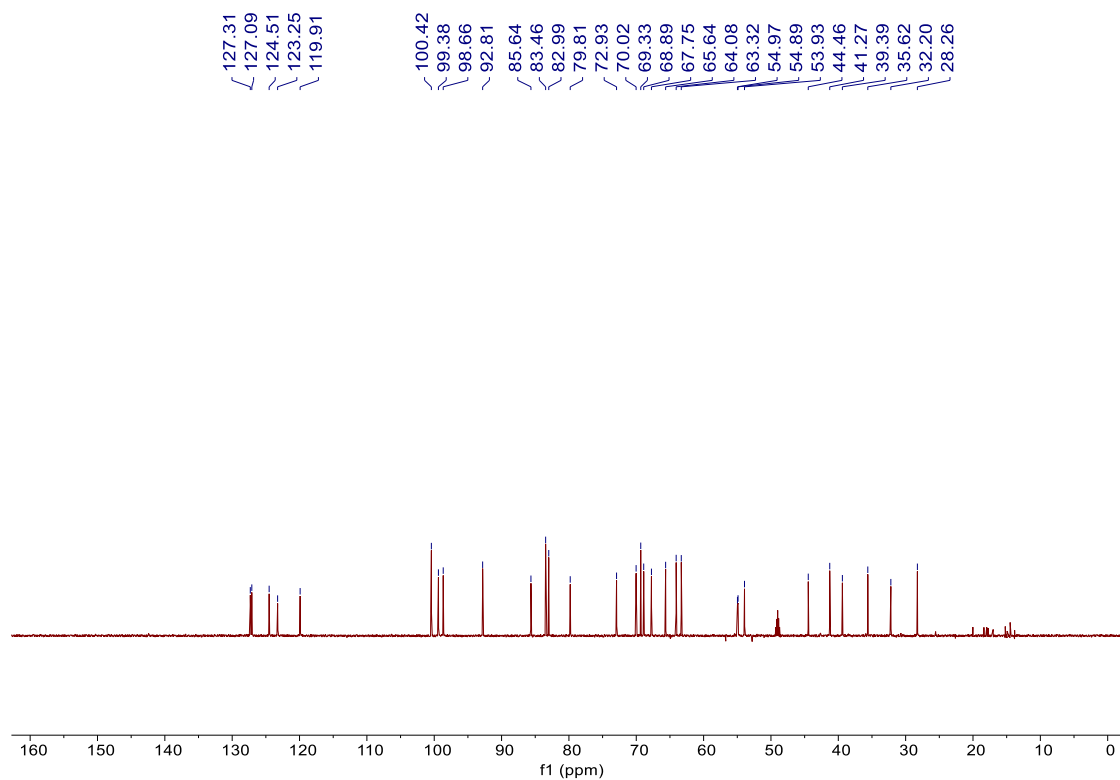

**Figure S16** DEPT 135 spectrum of **2** in CD<sub>3</sub>OD.

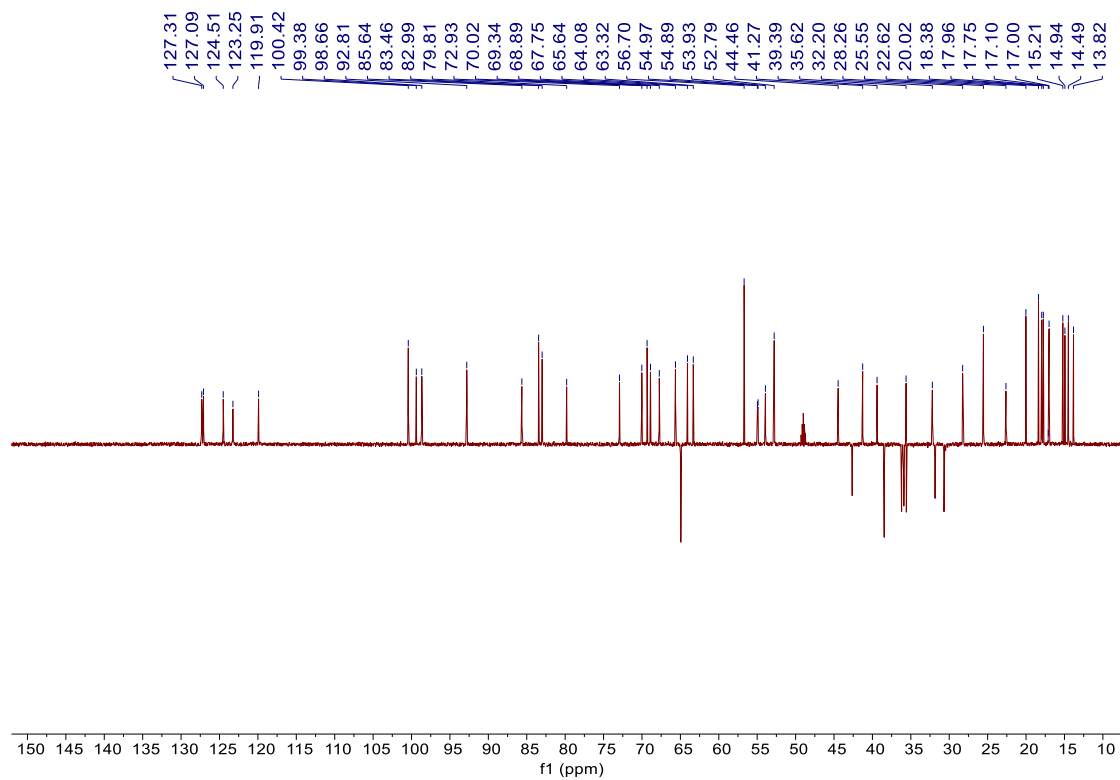

**Figure S17**  $^1\text{H}$ - $^1\text{H}$  COSY spectrum of **2** in  $\text{CD}_3\text{OD}$ .

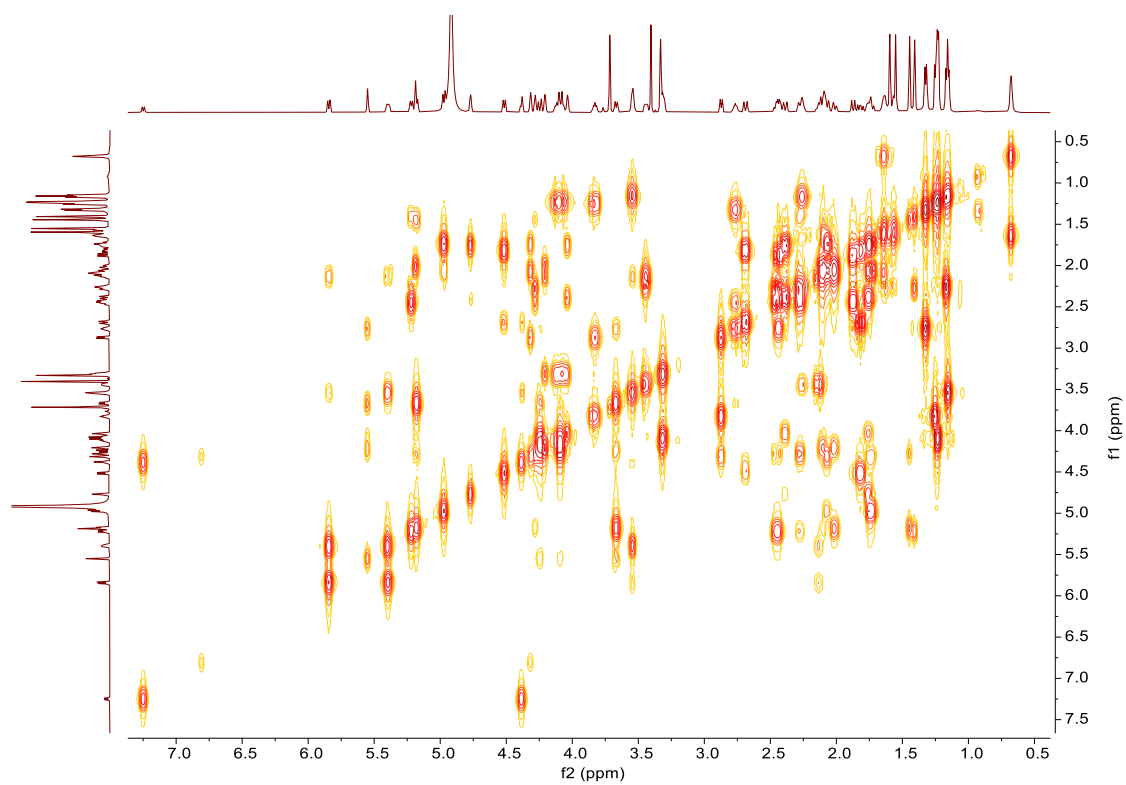

**Figure S18** HSQC spectrum of **2** in  $\text{CD}_3\text{OD}$ .

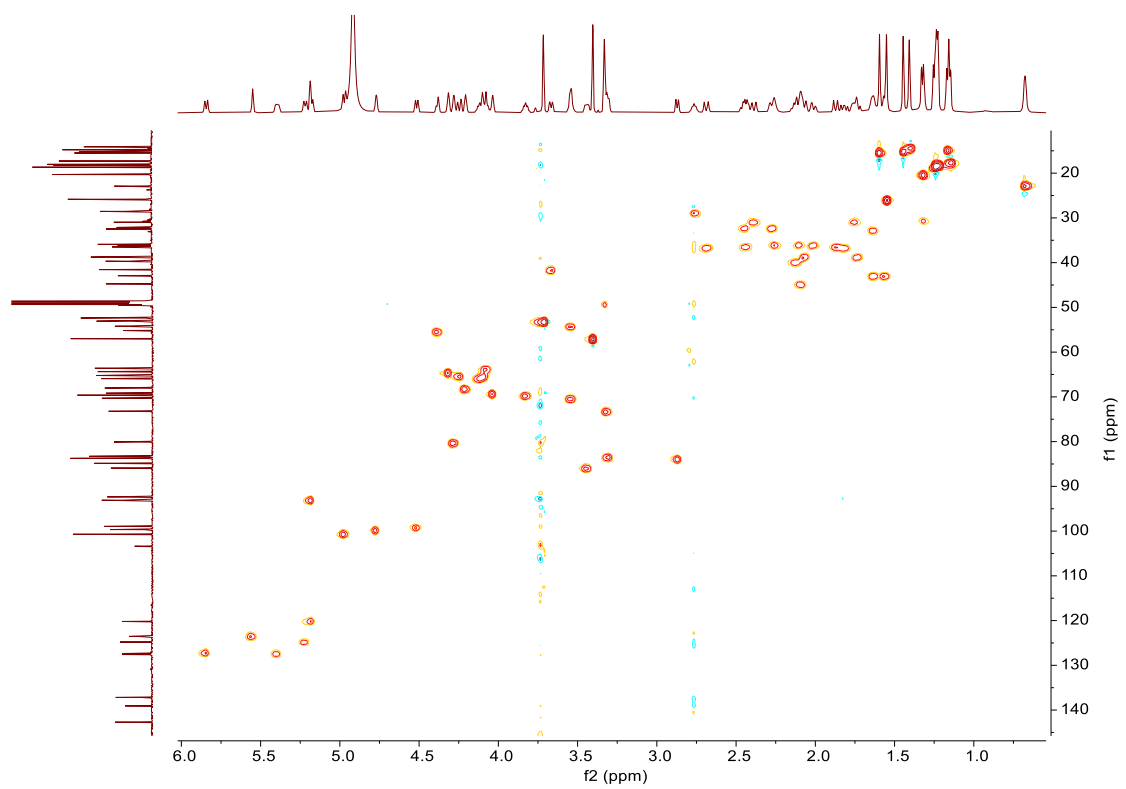

**Figure S19** HMBC spectrum of **2** in CD<sub>3</sub>OD.

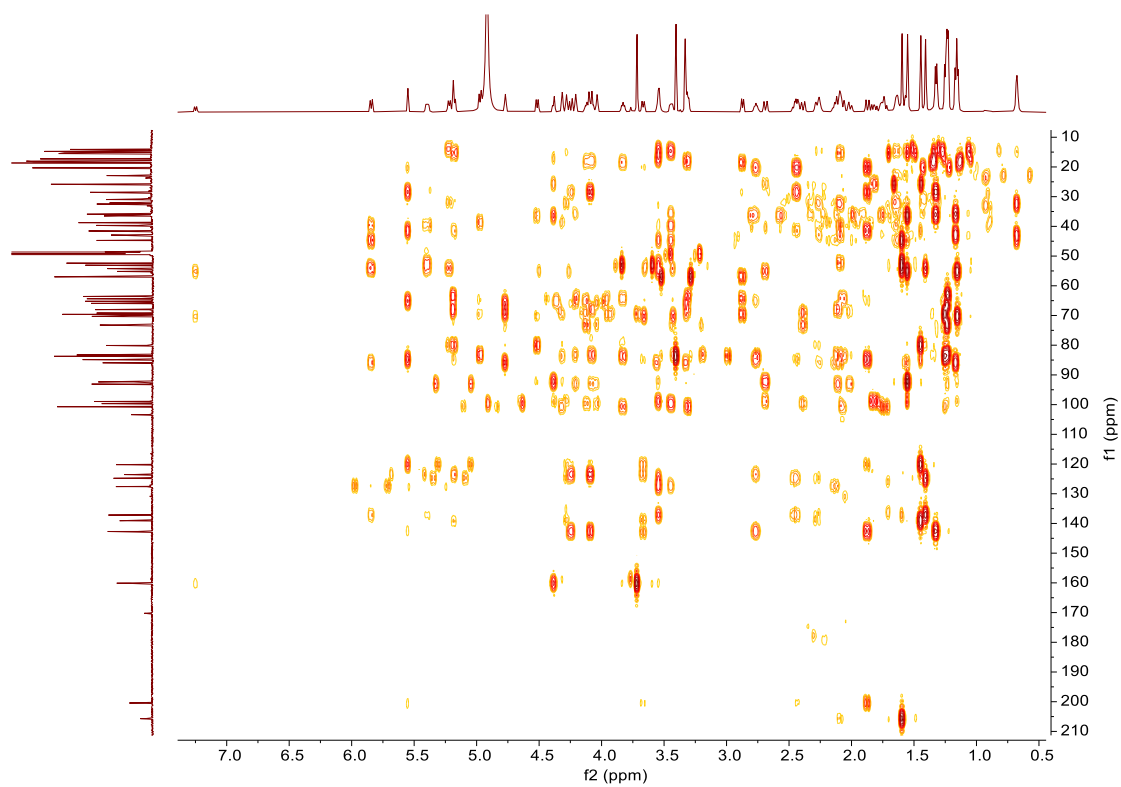

**Figure S20** NOESY spectrum of **2** in CD<sub>3</sub>OD.

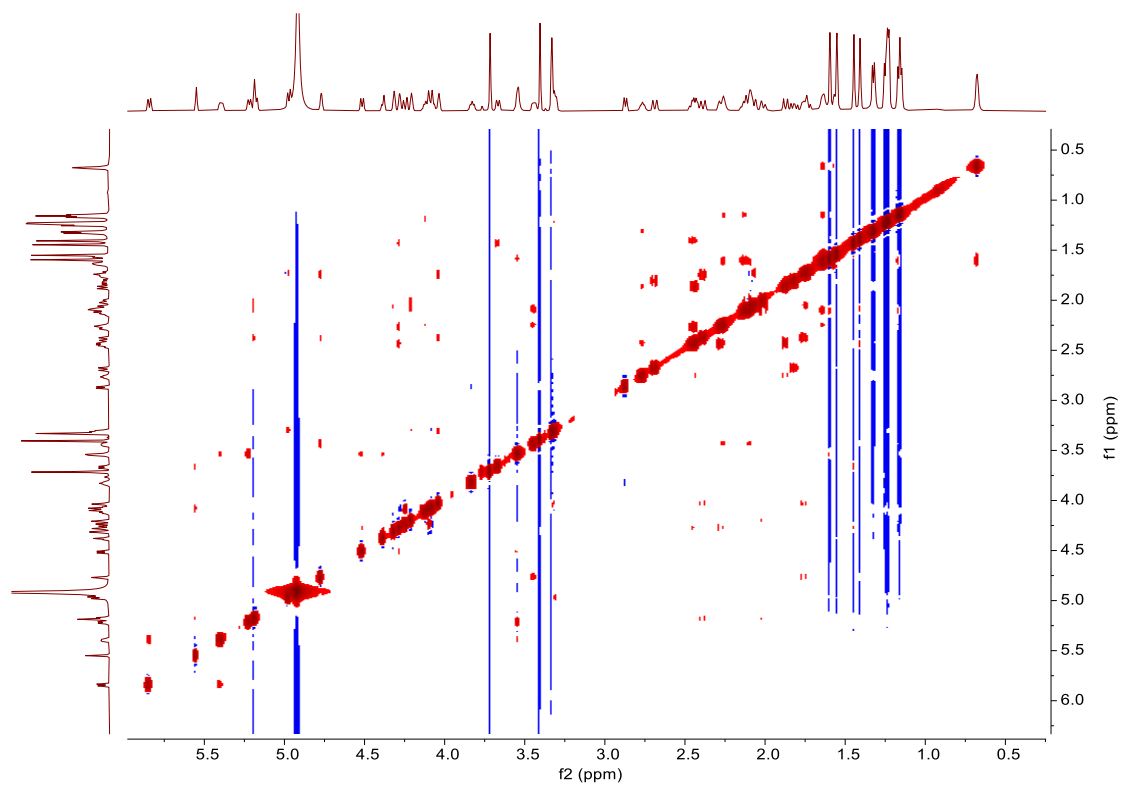

**Figure S21**  $^1\text{H}$  NMR spectrum of **3** in  $\text{CD}_3\text{OD}$  (500 MHz).

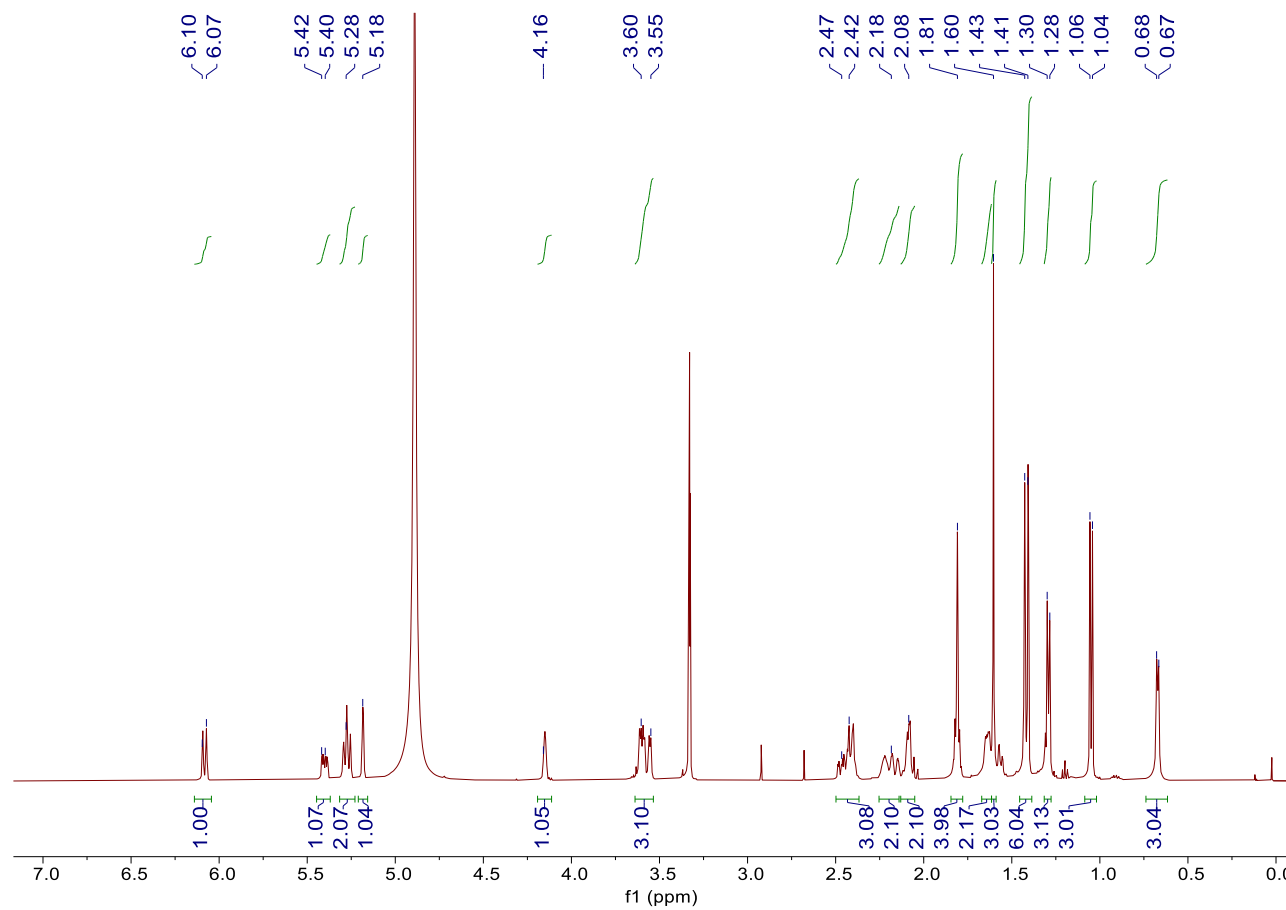

**Figure S22**  $^{13}\text{C}$ -NMR spectrum of **3** in  $\text{CD}_3\text{OD}$  (125 MHz).

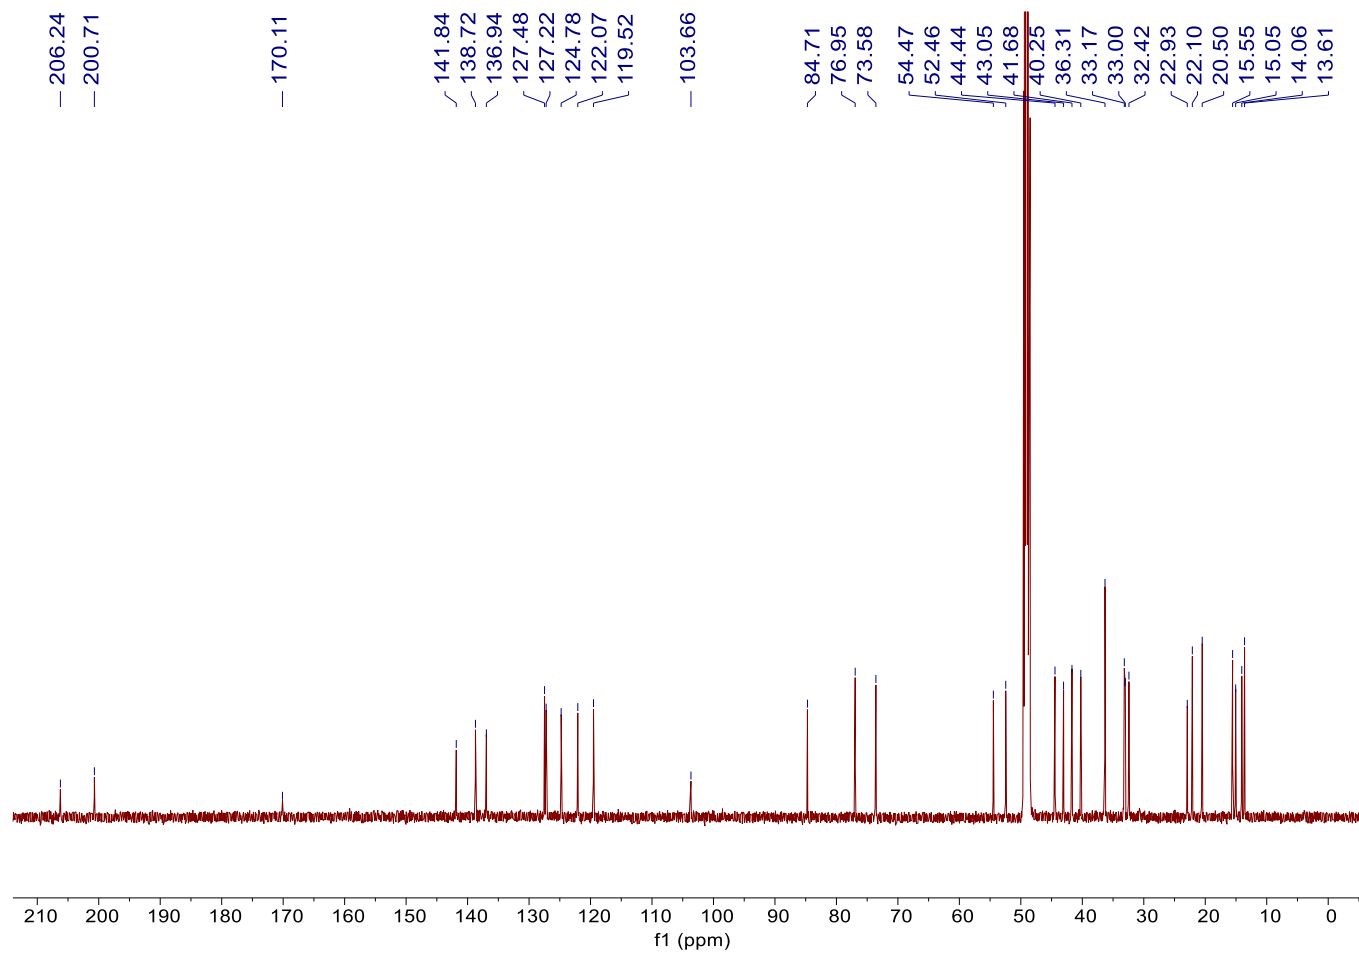

**Figure S23** DEPT 90 spectrum of **3** in CD<sub>3</sub>OD.

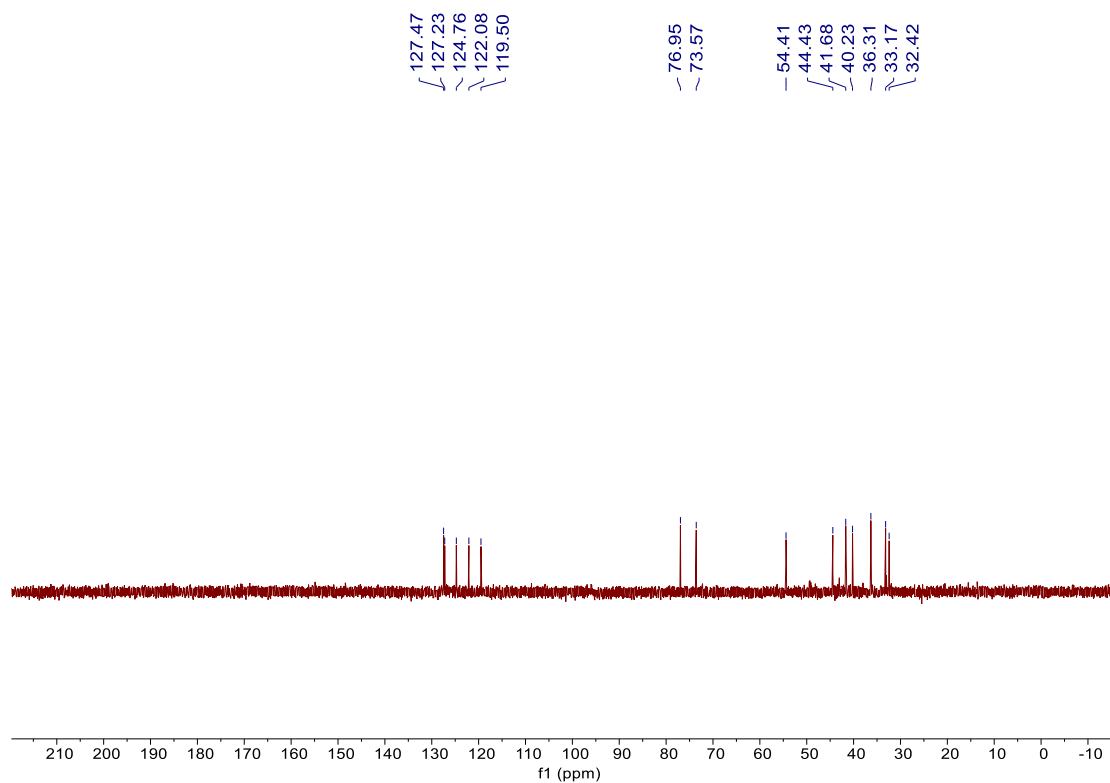

**Figure S24** DEPT 135 spectrum of **3** in CD<sub>3</sub>OD.

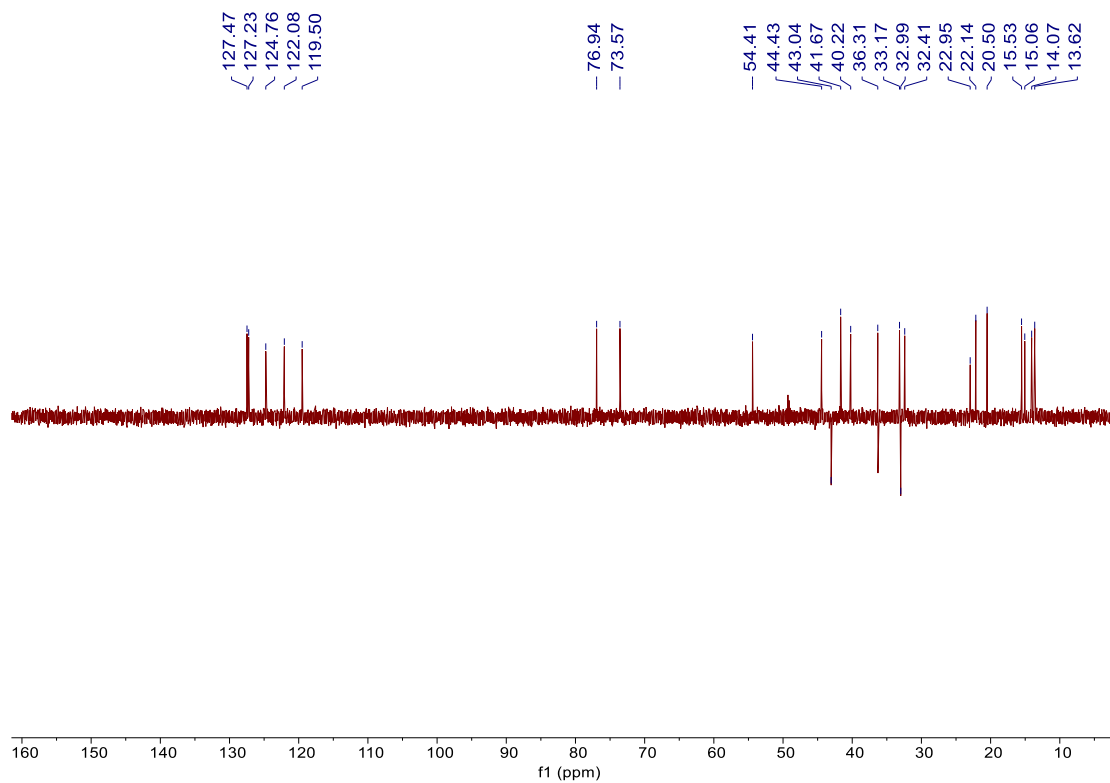



**Figure S25**  $^1\text{H}$ - $^1\text{H}$  COSY spectrum of **3** in  $\text{CD}_3\text{OD}$ .

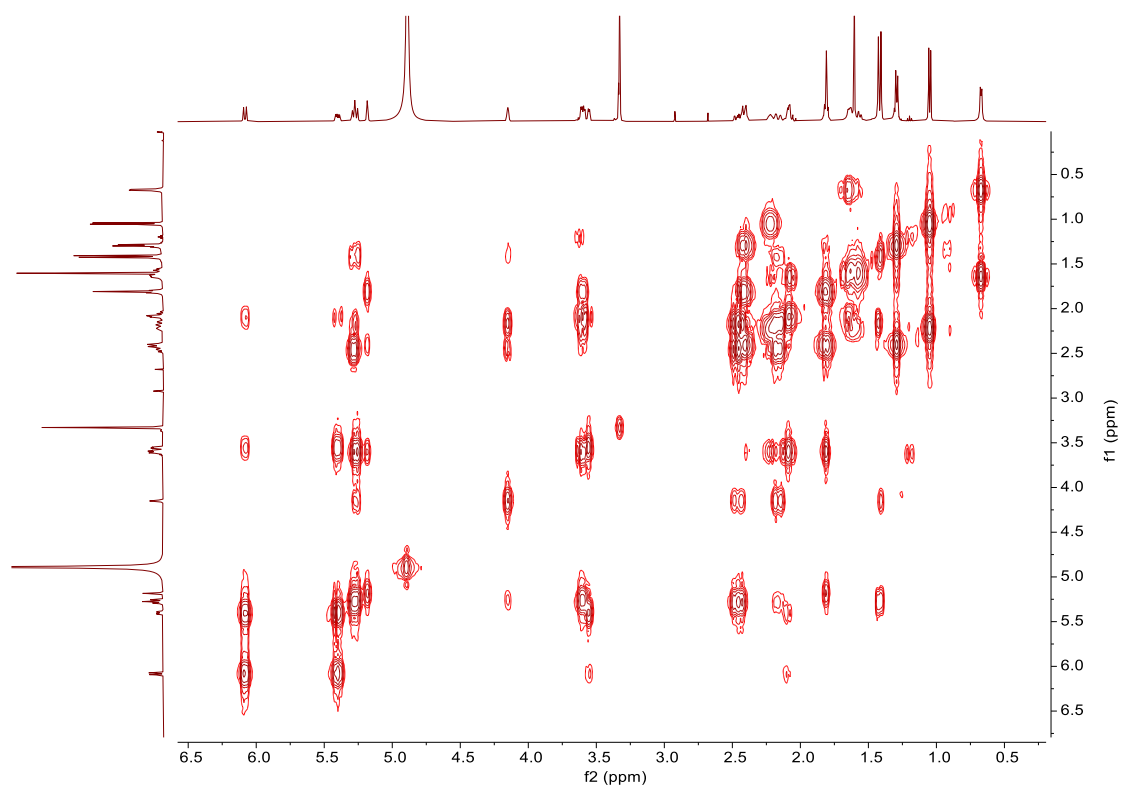

**Figure S26** HSQC spectrum of **3** in  $\text{CD}_3\text{OD}$ .

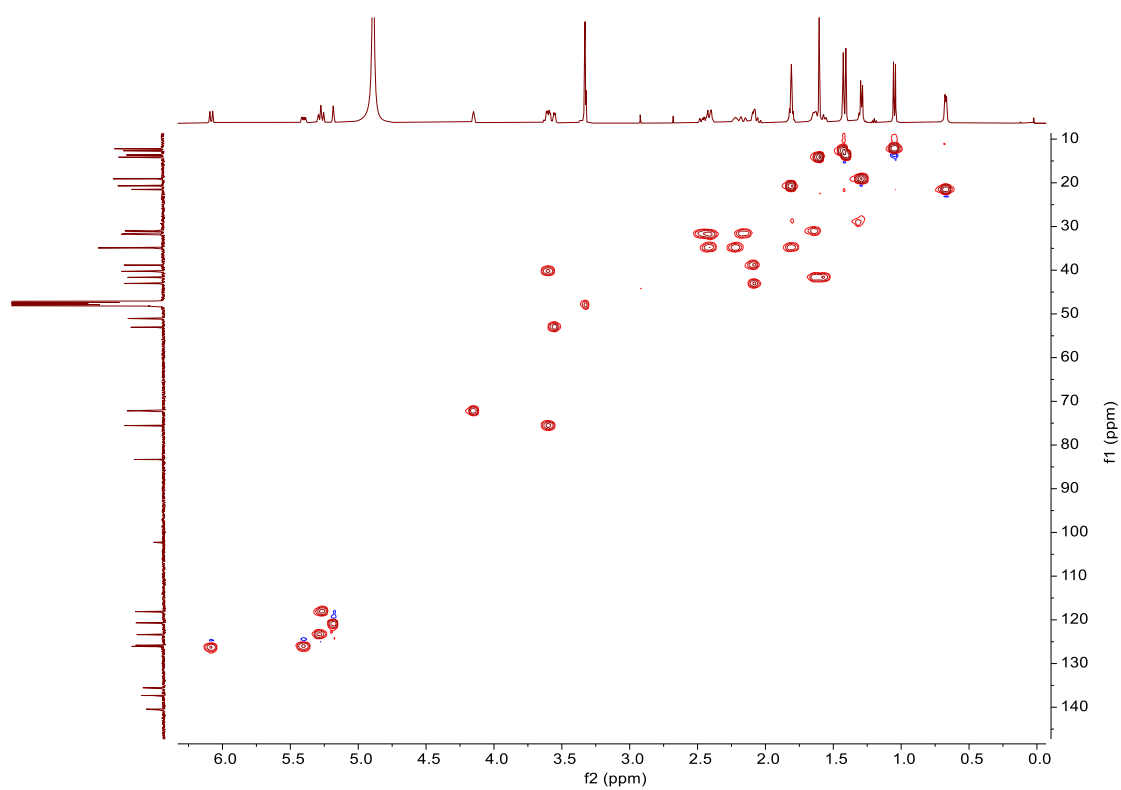

**Figure S27** HMBC spectrum of **3** in CD<sub>3</sub>OD.

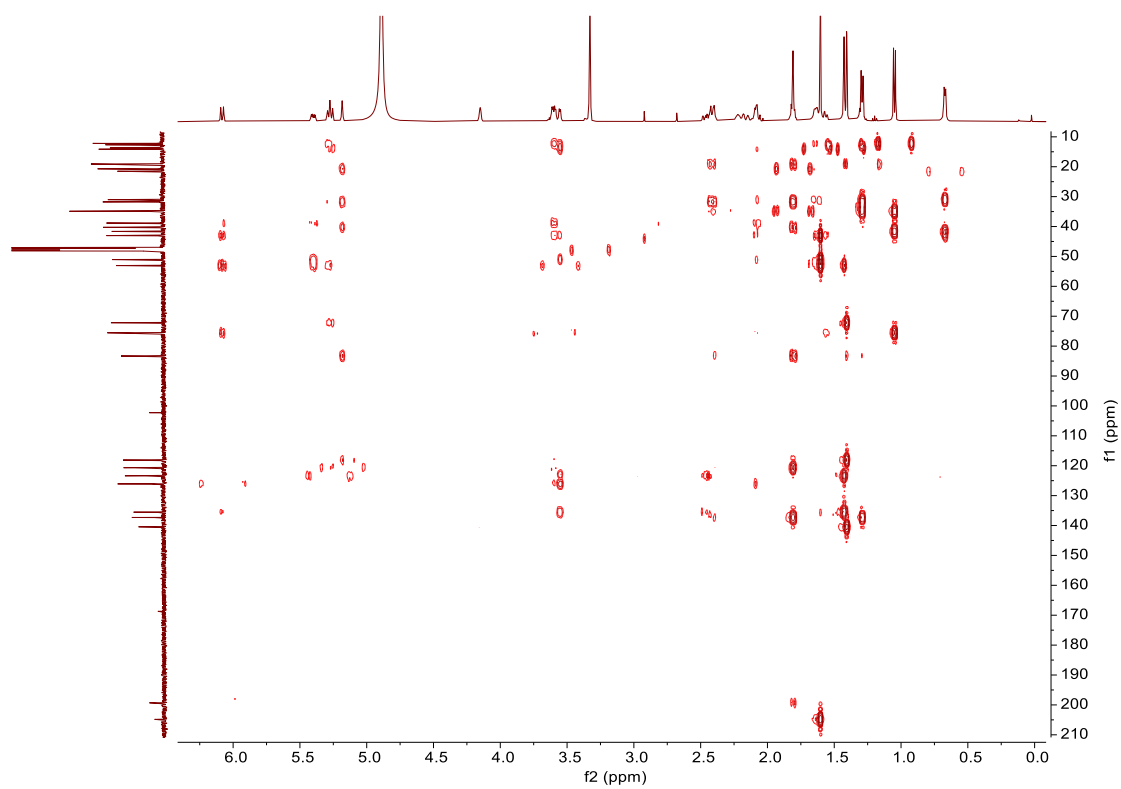

**Figure S28** NOESY spectrum of **3** in CD<sub>3</sub>OD.

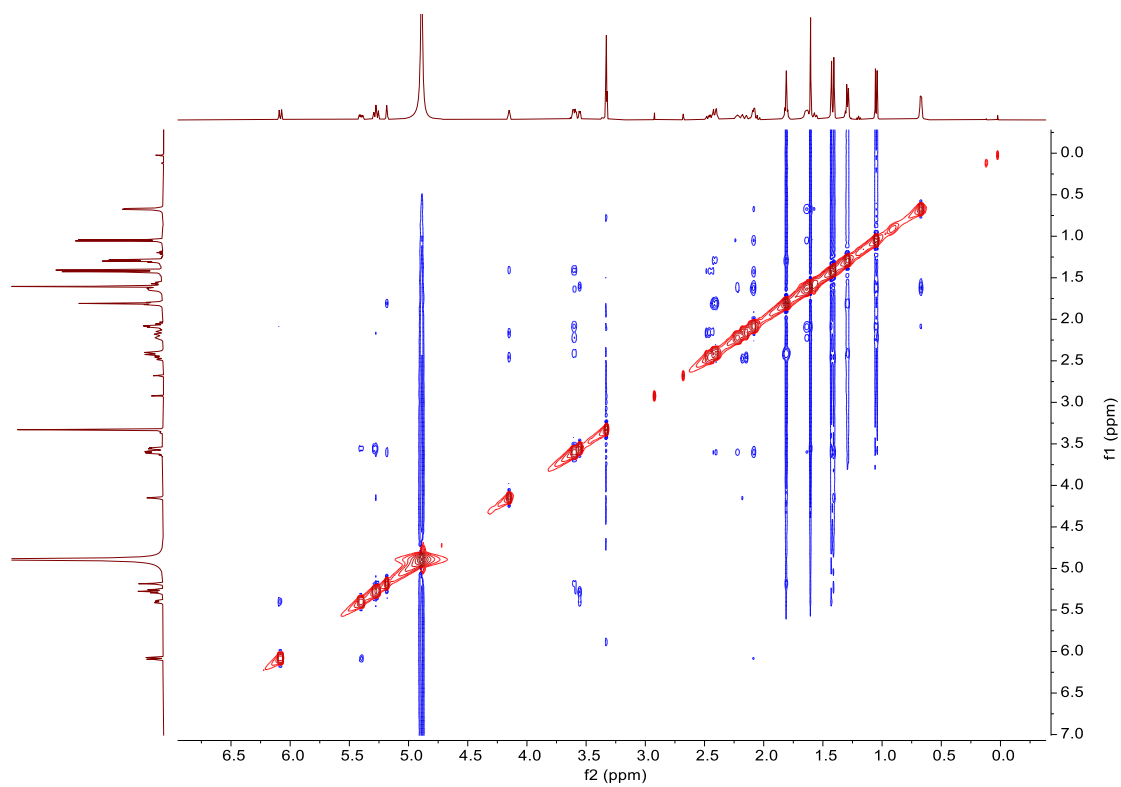

**Figure S29**  $^1\text{H}$  NMR spectrum of **4** in  $\text{CD}_3\text{OD}$  (600 MHz).

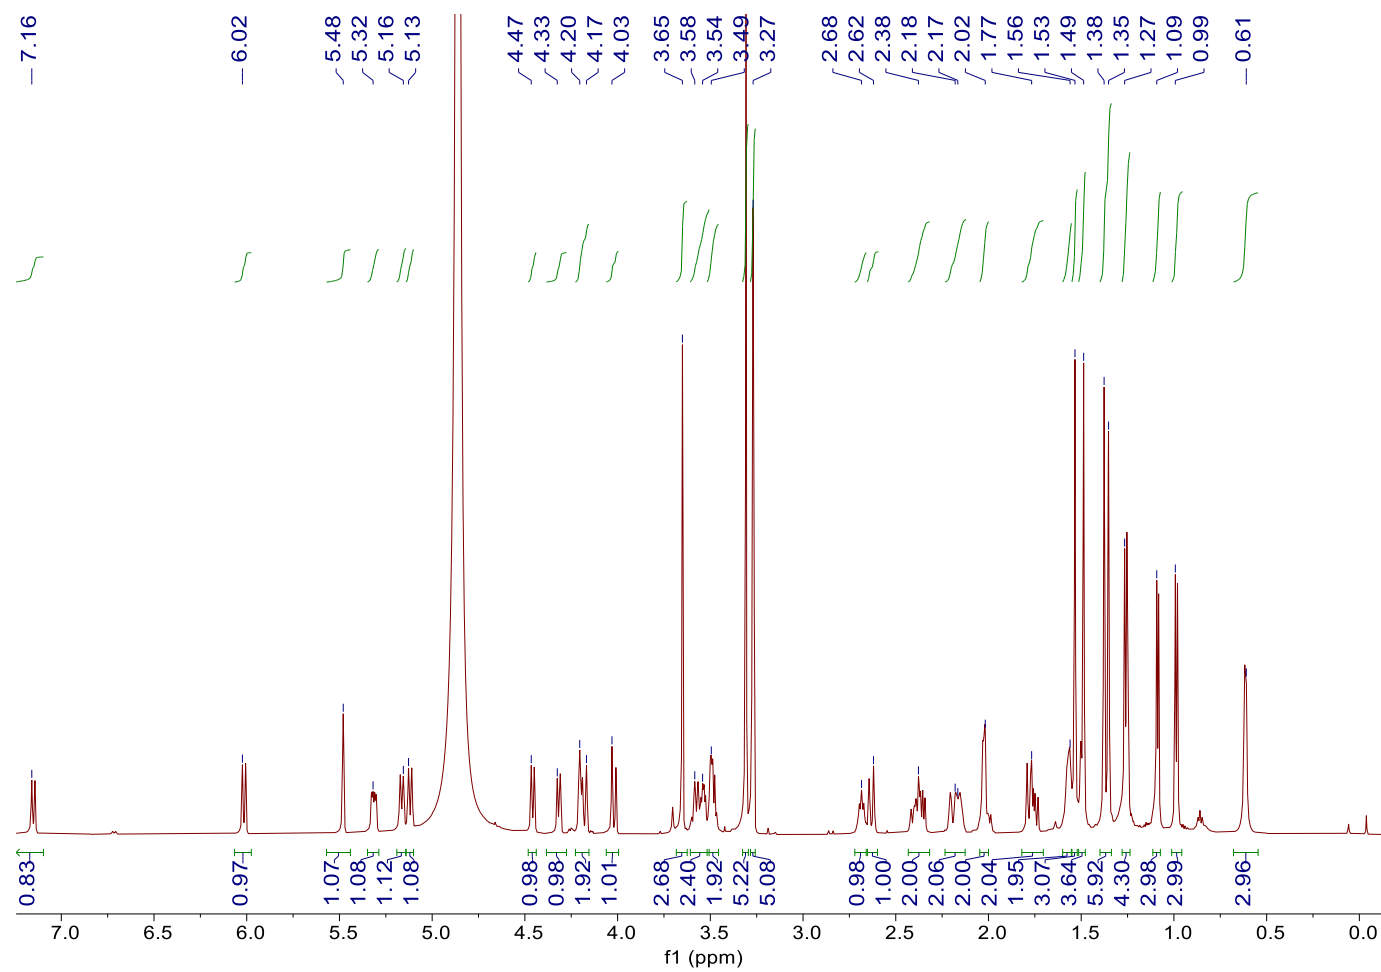

**Figure S30**  $^{13}\text{C}$  NMR spectrum of **4** in  $\text{CD}_3\text{OD}$  (150 MHz).

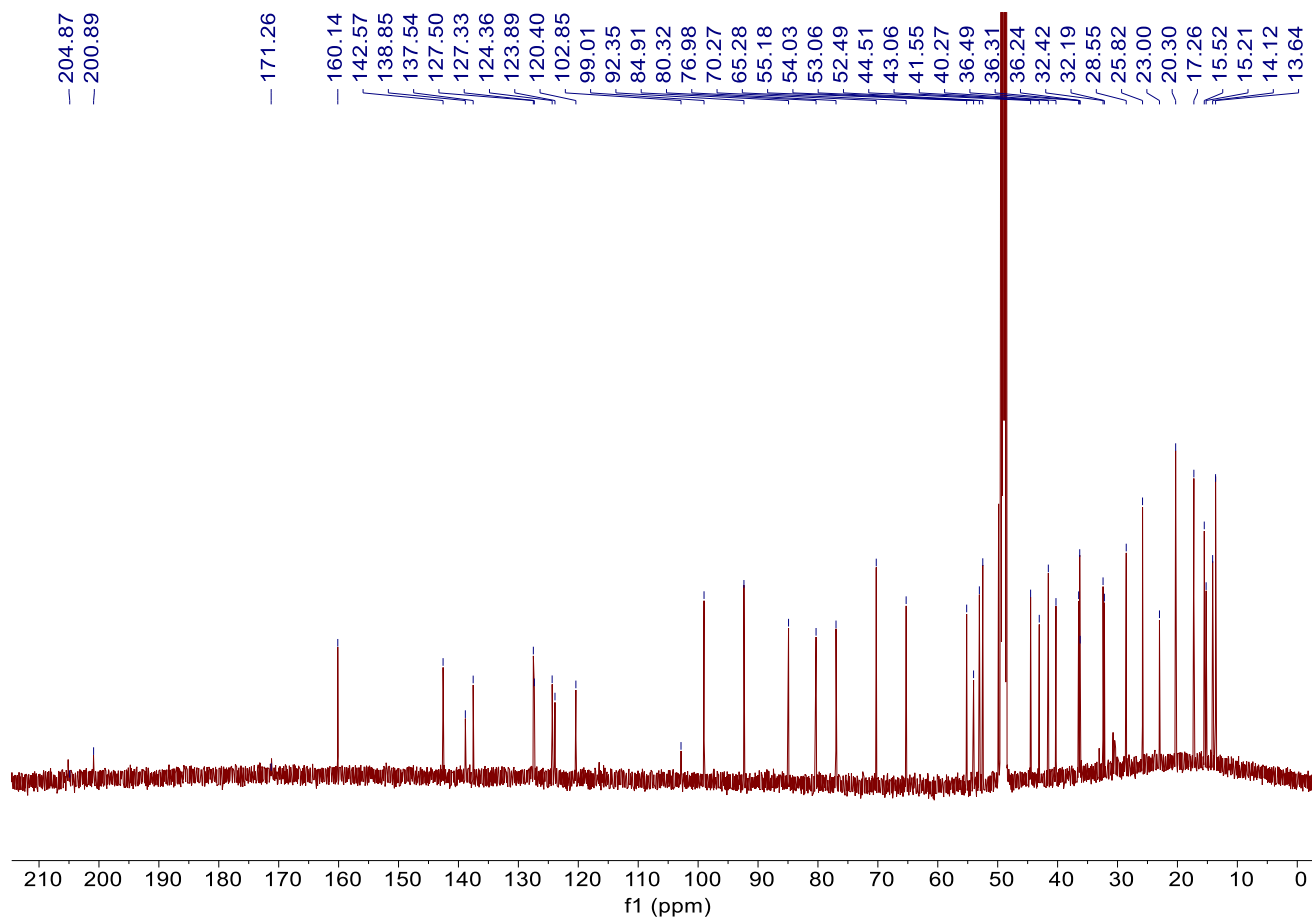

**Figure S31** DEPT 90 spectrum of **4** in CD<sub>3</sub>OD.

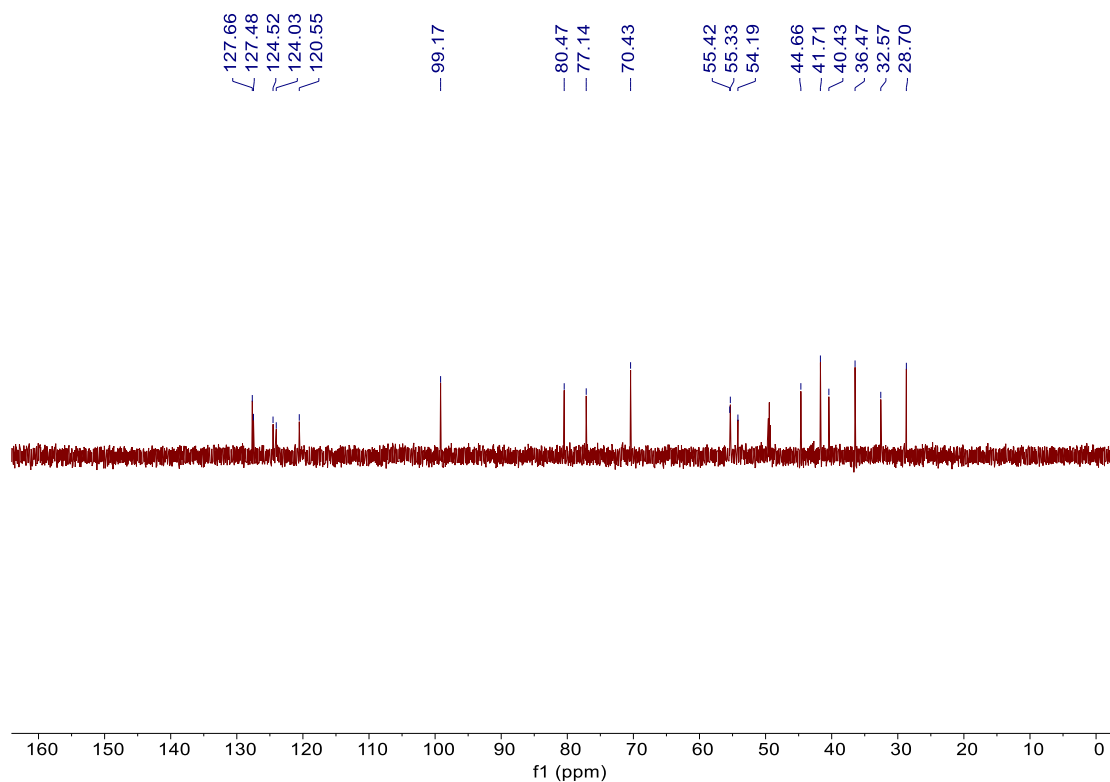

**Figure S32** DEPT 135 spectrum of **4** in CD<sub>3</sub>OD.

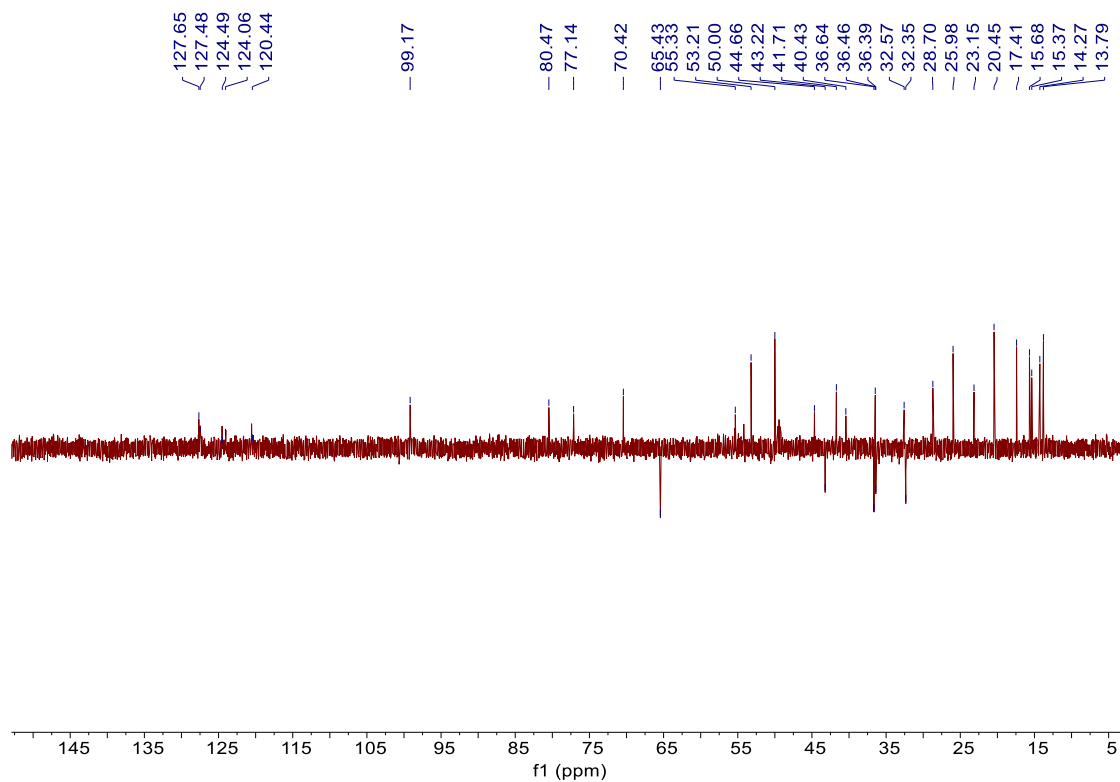

**Figure S33**  $^1\text{H}$ - $^1\text{H}$  COSY spectrum of **4** in  $\text{CD}_3\text{OD}$ .

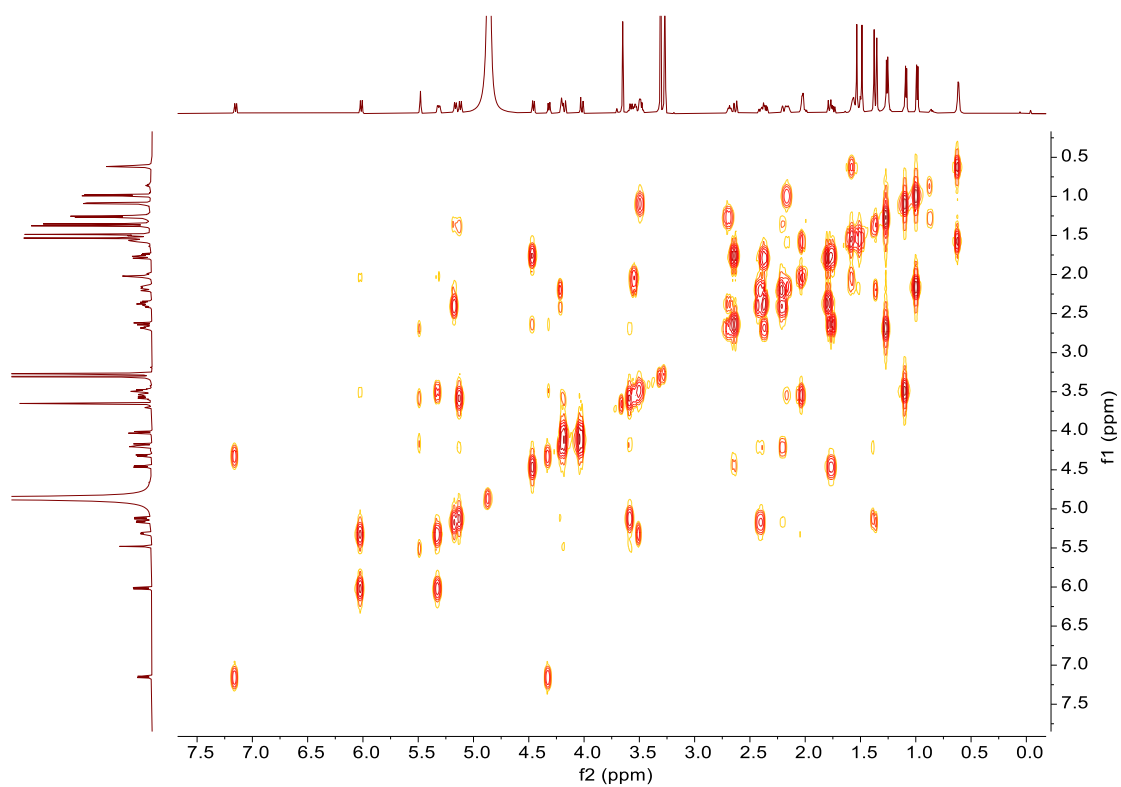

**Figure S34** HSQC spectrum of **4** in  $\text{CD}_3\text{OD}$ .

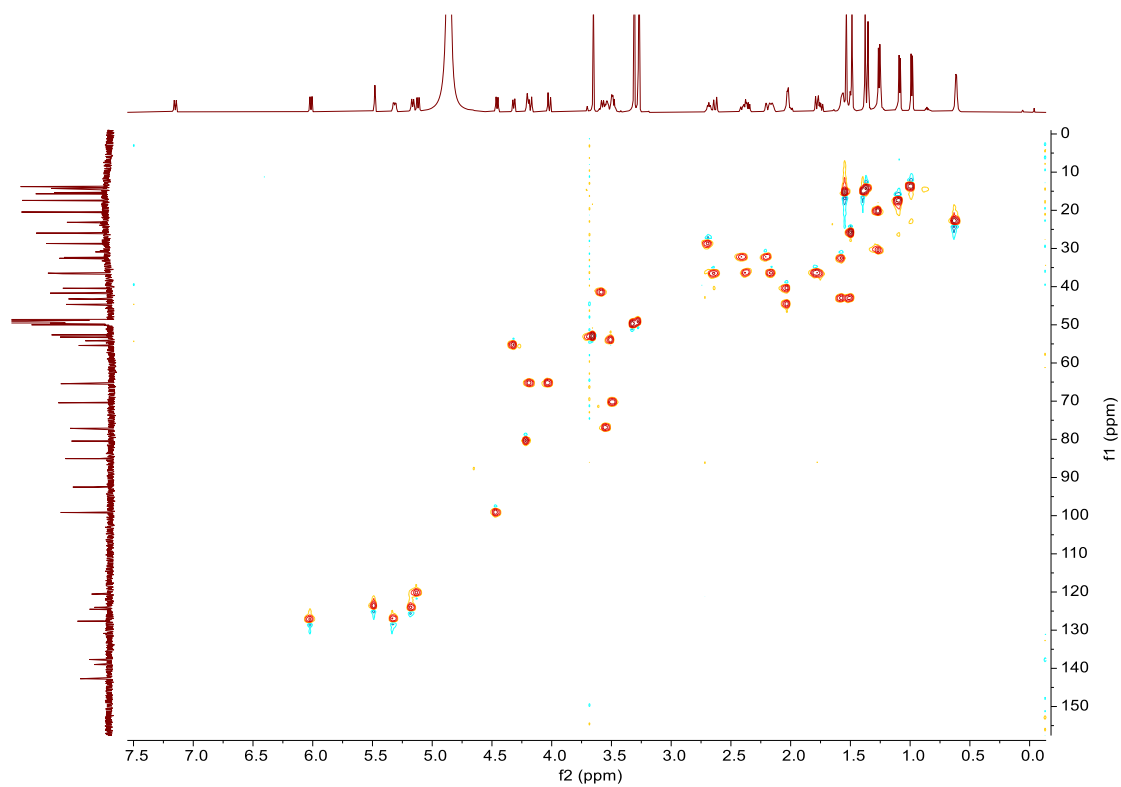

**Figure S35** HMBC spectrum of **4** in CD<sub>3</sub>OD.

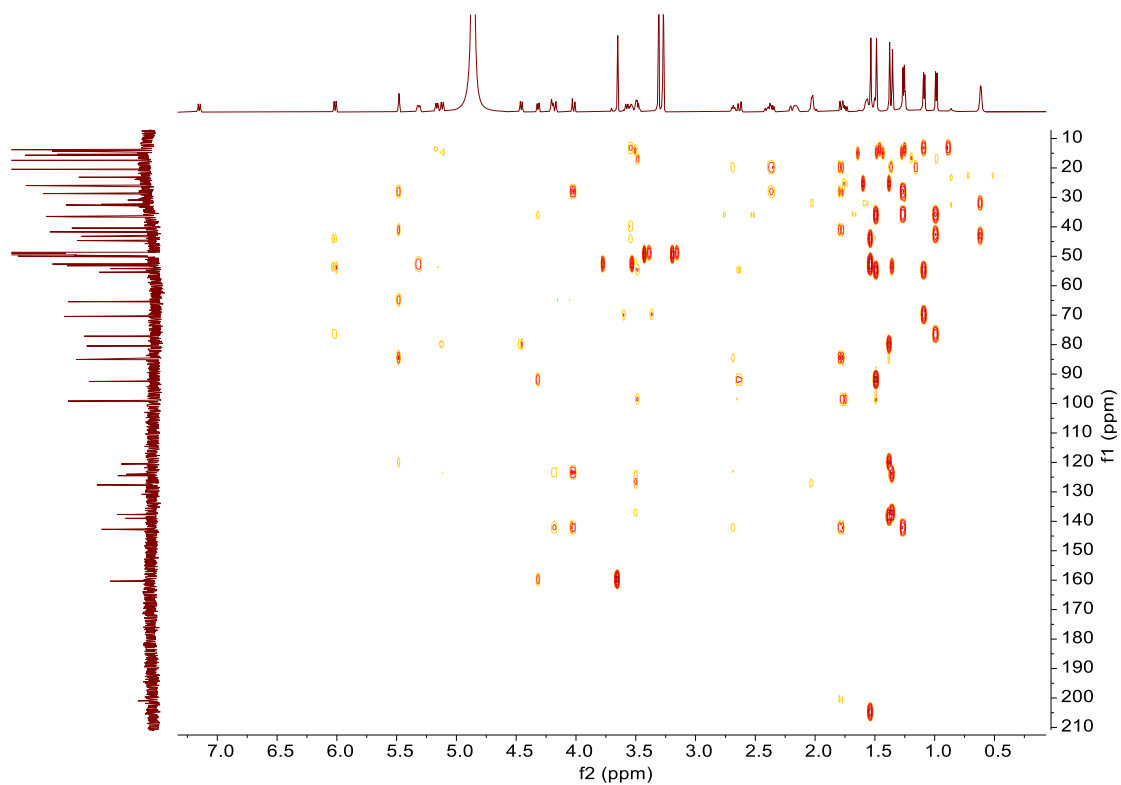

**Figure S36** NOESY spectrum of **4** in CD<sub>3</sub>OD.

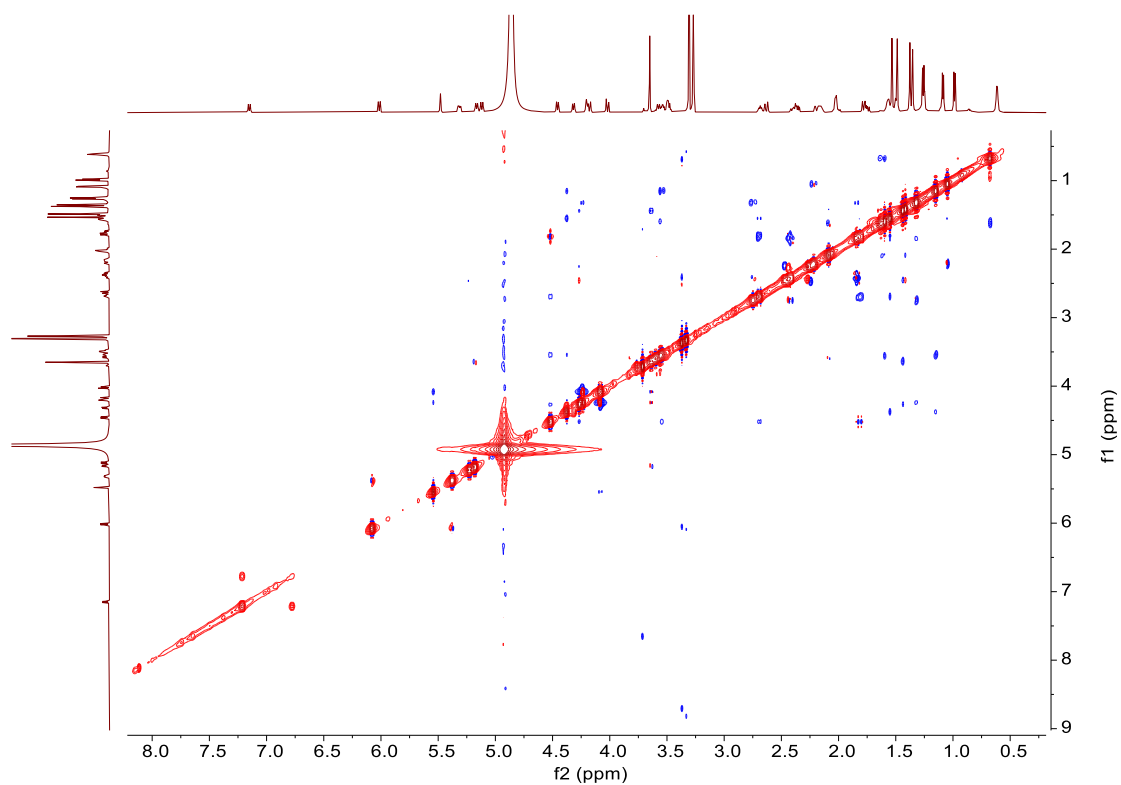

---

## References

- [1] Jiang, Z.D.; Jensen, P.R.; Fenical, W. Lobophorins A and B, new antiinflammatory macrolides produced by a tropical marine bacterium. *Bioorg. Med. Chem. Lett.* 1999, 9, 2003-2006.
- [2] Chen, C.; Wang, J.; Guo, H.; Hou, W.; Yang, N.; Ren, B.; Liu, M.; Dai, H.; Liu, X.; Song, F.; Zhang, L. Three antimycobacterial metabolites identified from a marine-derived *Streptomyces* sp. MS100061. *Appl. Microbiol. Biotechnol.* 2013, 97 (9), 3885-3892.
- [3] Mallams, A. K., Puar, M. S., Rossman, R. R., McPhail, A. T., Macfarlane, R. D., Stephens, R. L. Kijanimicin. Part 3. Structure and absolute stereochemistry of kijanimicin. *J. Chem. Soc.* 1983, 1, 1497-1534.
- [4] Luo, M. H.; Tang, L. J.; Dong, Y. L.; Huang, H.; Deng, Z.; Sun, Y. Antibacterial natural products lobophorin L and M from the marine-derived *Streptomyces* sp. 4506. *Nat. Prod. Res.* 2020, 27, 5581-5587.
- [5] Tan B, Chen S, Zhang Q, et al. Heterologous expression leads to discovery of diversified lobophorin analogues and a flexible glycosyltransferase. *Org. Lett.*, 2020.
- [6] Wei, R. B.; Xi, T.; Li, J.; Wang, P.; Li, F.-C.; Lin, Y.-C.; Qin, S., Lobophorin C and D, new kijanimicin derivatives from a marine sponge-associated actinomycetal strain AZS17. *Mar. Drugs* 2011, 9 (3), 359-368.
- [7] Niu, S.; Li, S.; Chen, Y.; Tian, X.; Zhang, H.; Zhang, G.; Zhang, W.; Yang, X.; Zhang, S.; Ju, J.; Zhang, C. Lobophorins E and F, new spirotetronate antibiotics from a South China Sea-derived *Streptomyces* sp SCSIO 01127. *J. Antibiot.* 2011, 64 (11), 711-716.
- [8] Pan, H. Q.; Zhang, S. Y.; Wang, N.; Li, Z. L.; Hua, H. M.; Hu, J. C.; Wang, S. J. New spirotetronate antibiotics, lobophorins H and I, from a South China Sea-derived *Streptomyces* sp. 12A35. *Mar. Drugs* 2013, 11 (10), 3891-901.
- [9] Song C F; Pan H Q; C, H. J., Isolation and identification of a new antibiotic, lobophorin J, from a deep sea-derived *Streptomyces* sp. 12A35. *Chin. J. Antibiot* 2015, 40 (10), 721-727.
- [10] Brana, A. F.; Sarmiento-Vizcaino, A.; Osset, M.; Perez-Victoria, I.; Martin, J.; de Pedro, N.; de la Cruz, M.; Diaz, C.; Vicente, F.; Reyes, F.; Garcia, L. A.; Blanco, G., Lobophorin K, a new natural product with cytotoxic activity produced by *Streptomyces* sp. M-207 associated with the deep-sea coral *Lophelia pertusa*. *Mar. Drugs* 2017, 15 (5), 144.
- [11] Cruz, P. G.; Fribley, A. M.; Miller, J. R.; Larsen, M. J.; Schultz, P. J.; Jacob, R. T.; Tamayo-Castillo, G.; Kaufman, R. J.; Sherman, D. H., Novel lobophorins inhibit oral cancer cell growth and induce Atf4- and Chop-dependent cell death in murine fibroblasts. *ACS Med. Chem. Lett.* 2015, 6 (8), 877-81.
- [12] Zhang, C.; Ding, W.; Qin, X.; Ju, J., Genome sequencing of *Streptomyces olivaceus* SCSIO T05 and activated production of lobophorin CR4 via metabolic engineering and genome mining. *Mar. Drugs* 2019, 17 (10), 593.
- [13] Tan, B.; Zhang, Q.B.; Xiao, J.; Yuan, C.S.; Chen, Y.C.; Chen, S.Q.; Zhang, W.M.; Zhu, Y.G.; Zhang, C.S. Characterization of the P450 monooxygenase LobP1 as C-32 hydroxylase in Lobophorin biosynthesis. *Chin. J. Chem.* 2023, DOI:



---

10.1002/cjoc.202200818.
